# Supplementary material for: Selenite Serves as a Versatile Proxy for Phosphate Homeostasis Studies
Source: Research Square preprint supplement (doi:10.21203/rs.3.rs-6806744/v1), 2025-06-12
Supplement: Supplementary file 1 [file b82adcf8a776173548810145.xlsx]

## Sheet: Sheet1
Number	GO ID	Term Type	Description	Ratio_in_study	Ratio_in_pop	Rich factor	Pvalue	Padjust	Gene_ids	Gene_names
12	GO:0016102	BP	diterpenoid biosynthetic process	12/ 585	77/ 32702	0.155844	1.25673e-07	0.000217096	Os06g0568600;Os04g0178300;Os02g0569400;Os06g0569500;Os07g0217600;Os06g0599200;Os02g0569000;Os04g0179700;Os12g0491800;Os02g0569900;Os01g0561600;Os02g0571900	OsKO5;OsCPS4;CYP76M8;KO4;CYP71Z2;;CYP76M5;OsKS4;OsKSL10;OsCYP76M7;CYP76M14;CYP76M6
15	GO:0016101	BP	diterpenoid metabolic process	15/ 585	97/ 32702	0.154639	1.71908e-07	0.000217096	Os06g0568600;Os04g0178400;Os04g0178300;Os04g0179700;Os06g0569500;Os04g0180400;Os07g0217600;Os06g0599200;Os02g0569000;Os02g0181300;Os02g0569400;Os12g0491800;Os02g0569900;Os01g0561600;Os02g0571900	OsKO5;;OsCPS4;OsKS4;KO4;CYP99A2;CYP71Z2;;CYP76M5;WRKY71;CYP76M8;OsKSL10;OsCYP76M7;CYP76M14;CYP76M6
8	GO:0052314	BP	phytoalexin metabolic process	8/ 585	9/ 32702	0.888889	2.13852e-07	0.000217096	Os06g0568600;Os06g0569500;Os02g0569900;Os02g0569000;Os02g0569400;Os01g0561600;Os02g0571900;Os06g0599200	OsKO5;KO4;OsCYP76M7;CYP76M5;CYP76M8;CYP76M14;CYP76M6;
8	GO:0052315	BP	phytoalexin biosynthetic process	8/ 585	9/ 32702	0.888889	2.13852e-07	0.000217096	Os06g0568600;Os06g0569500;Os02g0569900;Os02g0569000;Os02g0569400;Os01g0561600;Os02g0571900;Os06g0599200	OsKO5;KO4;OsCYP76M7;CYP76M5;CYP76M8;CYP76M14;CYP76M6;
8	GO:0051501	BP	diterpene phytoalexin metabolic process	8/ 585	9/ 32702	0.888889	2.13852e-07	0.000217096	Os06g0568600;Os06g0569500;Os02g0569900;Os02g0569000;Os02g0569400;Os01g0561600;Os02g0571900;Os06g0599200	OsKO5;KO4;OsCYP76M7;CYP76M5;CYP76M8;CYP76M14;CYP76M6;
8	GO:0051502	BP	diterpene phytoalexin biosynthetic process	8/ 585	9/ 32702	0.888889	2.13852e-07	0.000217096	Os06g0568600;Os06g0569500;Os02g0569900;Os02g0569000;Os02g0569400;Os01g0561600;Os02g0571900;Os06g0599200	OsKO5;KO4;OsCYP76M7;CYP76M5;CYP76M8;CYP76M14;CYP76M6;
8	GO:0009403	BP	toxin biosynthetic process	8/ 585	9/ 32702	0.888889	2.13852e-07	0.000217096	Os06g0568600;Os06g0569500;Os02g0569900;Os02g0569000;Os02g0569400;Os01g0561600;Os02g0571900;Os06g0599200	OsKO5;KO4;OsCYP76M7;CYP76M5;CYP76M8;CYP76M14;CYP76M6;
8	GO:0009404	BP	toxin metabolic process	8/ 585	9/ 32702	0.888889	2.13852e-07	0.000217096	Os06g0568600;Os06g0569500;Os02g0569900;Os02g0569000;Os02g0569400;Os01g0561600;Os02g0571900;Os06g0599200	OsKO5;KO4;OsCYP76M7;CYP76M5;CYP76M8;CYP76M14;CYP76M6;
16	GO:0016709	MF	oxidoreductase activity, acting on paired donors, with incorporation or reduction of molecular oxygen, NAD(P)H as one donor, and incorporation of one atom of oxygen	16/ 585	161/ 32702	0.0993789	2.30871e-07	0.000217096	Os08g0507100;Os06g0568600;Os06g0599200;Os04g0223500;Os08g0508000;Os04g0178400;Os10g0139700;Os06g0569500;Os03g0570100;Os04g0180400;Os02g0569900;Os02g0569000;Os02g0569400;Os01g0561600;Os01g0356951;Os02g0571900	CYP76M10;OsKO5;;;CYP76M2;;;KO4;;CYP99A2;OsCYP76M7;CYP76M5;CYP76M8;CYP76M14;;CYP76M6
17	GO:0006721	BP	terpenoid metabolic process	17/ 585	195/ 32702	0.0871795	5.22644e-07	0.000442313	Os04g0180400;Os06g0568600;Os06g0599200;Os04g0178400;Os12g0435200;Os07g0190000;Os04g0179700;Os06g0569500;Os04g0178300;Os07g0217600;Os02g0569900;Os02g0569000;Os02g0181300;Os02g0569400;Os12g0491800;Os01g0561600;Os02g0571900	CYP99A2;OsKO5;;;OsNCED2;OsDXS;OsKS4;KO4;OsCPS4;CYP71Z2;OsCYP76M7;CYP76M5;WRKY71;CYP76M8;OsKSL10;CYP76M14;CYP76M6
21	GO:0030247	MF	polysaccharide binding	21/ 585	305/ 32702	0.0688525	7.66461e-07	0.000589687	Os10g0111400;Os01g0115566;Os01g0136800;Os01g0137950;Os01g0690600;Os05g0550800;Os01g0115950;Os04g0371000;Os11g0691280;Os01g0138400;Os01g0136900;Os01g0137700;Os09g0471400;Os01g0136700;Os11g0691400;Os11g0694100;Os09g0482640;Os01g0137875;Os04g0370900;Os01g0115600;Os02g0632800	OsWAK95;OsRLCK10;OsWAK2;OsRLCK23;;;;;OsRLCK353;;;;OsWAK81;;;OsWAK123;OsWAK87;;;OsRLCK11;WAK14
9	GO:0009611	BP	response to wounding	9/ 585	58/ 32702	0.155172	8.61362e-07	0.000597822	Os01g0194300;Os12g0437800;Os03g0180900;Os01g0615050;Os02g0181300;Os08g0508800;Os10g0392400;Os01g0615100;Os08g0509100	NH1;Sci1;OsJAZ2;;WRKY71;Lox2:Os:1;OsTIFY11d;OCPI2;OsLOX8
14	GO:0016114	BP	terpenoid biosynthetic process	14/ 585	157/ 32702	0.089172	9.88952e-07	0.000597822	Os06g0568600;Os06g0599200;Os12g0435200;Os07g0190000;Os04g0179700;Os06g0569500;Os04g0178300;Os07g0217600;Os02g0569900;Os02g0569000;Os02g0569400;Os12g0491800;Os01g0561600;Os02g0571900	OsKO5;;OsNCED2;OsDXS;OsKS4;KO4;OsCPS4;CYP71Z2;OsCYP76M7;CYP76M5;CYP76M8;OsKSL10;CYP76M14;CYP76M6
35	GO:0030246	MF	carbohydrate binding	35/ 585	716/ 32702	0.0488827	9.2759e-07	0.000597822	Os07g0130800;Os07g0131375;Os10g0536400;Os03g0772600;Os04g0458600;Os01g0137875;Os01g0115600;Os11g0607900;Os12g0130200;Os01g0870750;Os01g0115566;Os01g0137950;Os08g0514000;Os11g0694100;Os02g0632800;Os10g0111400;Os01g0690600;Os05g0550800;Os04g0371000;Os02g0640500;Os09g0471400;Os07g0550900;Os11g0691400;Os10g0558750;Os04g0288500;Os04g0370900;Os01g0136900;Os01g0136800;Os01g0137700;Os01g0115950;Os11g0691…	;;OsF3H-2;;;;OsRLCK11;OsRLCK336;;;OsRLCK10;OsRLCK23;;OsWAK123;WAK14;OsWAK95;;;;SIT1;OsWAK81;;;;;;;OsWAK2;;;OsRLCK353;;;ACO2;OsWAK87
78	GO:0006952	BP	defense response	78/ 585	1452/ 32702	0.053719	1.22587e-06	0.000609032	Os07g0130800;Os01g0915900;Os01g0194300;Os03g0663500;Os07g0131375;Os12g0481400;Os11g0598300;Os02g0569400;Os09g0313600;Os12g0555000;Os08g0485800;Os04g0288500;Os09g0571200;Os07g0597200;Os03g0772600;Os04g0179700;Os12g0491800;Os04g0205200;Os05g0322900;Os12g0629700;Os02g0571900;Os10g0473950;Os02g0640500;Os01g0160800;Os01g0721400;Os11g0673600;Os11g0229600;Os06g0267900;Os05g0494200;Os12g0628600;Os06g0599…	;;NH1;TLP;;;;CYP76M8;;RSOsPR10;;;;;;OsKS4;OsKSL10;;WRKY45;;CYP76M6;;SIT1;;;YR2;;;Oc2*;OsPR5;;;OsPR1b;WRKY71;WRKY28;;RPR10b;Cht1*(Chi1);;ABCG43;;PR10;;OsKS8;;OsCPS4;;;YR1;;Rpp17;;CYP99A2;CYP76M5;;OsLRR;;OsMLO10;;Cht11;OsCYP76M7;;Cht8;OsPR4c;;;OsPR5;;OsOPR4;;OsSDS1;OsPR4b;OsPR10a;;OsGSTU17;;OsLP;WRKY62
58	GO:0051707	BP	response to other organism	58/ 585	1335/ 32702	0.0434457	1.27046e-06	0.000609032	Os07g0130800;Os01g0915900;Os01g0194300;Os04g0205200;Os01g0670100;Os07g0131375;Os12g0481400;Os11g0227700;Os09g0313600;Os08g0485800;Os11g0598300;Os09g0551400;Os01g0670300;Os07g0597200;Os03g0772600;Os09g0314200;Os01g0721200;Os04g0356600;Os10g0473950;Os01g0870750;Os02g0640500;Os08g0508800;Os11g0673600;Os11g0229600;Os06g0267900;Os01g0721400;Os06g0698802;Os02g0181300;Os06g0649000;Os08g0514000;Os01g0864…	;;NH1;;;;;;;;;;;;;;;;;;SIT1;Lox2:Os:1;YR2;;;;;WRKY71;WRKY28;;OsSDS1;Cht1*(Chi1);;Cht8;ABCG43;;;YR1;;;;;OsLRR;;;Cht11;;WRKY76;OsPR4c;;OsPR4b;;;OsLOX8;;;WRKY62;
58	GO:0043207	BP	response to external biotic stimulus	58/ 585	1337/ 32702	0.0433807	1.29535e-06	0.000609032	Os07g0130800;Os01g0915900;Os01g0194300;Os04g0205200;Os01g0670100;Os07g0131375;Os12g0481400;Os11g0227700;Os09g0313600;Os08g0485800;Os11g0598300;Os09g0551400;Os01g0670300;Os07g0597200;Os03g0772600;Os09g0314200;Os01g0721200;Os04g0356600;Os10g0473950;Os01g0870750;Os02g0640500;Os08g0508800;Os11g0673600;Os11g0229600;Os06g0267900;Os01g0721400;Os06g0698802;Os02g0181300;Os06g0649000;Os08g0514000;Os01g0864…	;;NH1;;;;;;;;;;;;;;;;;;SIT1;Lox2:Os:1;YR2;;;;;WRKY71;WRKY28;;OsSDS1;Cht1*(Chi1);;Cht8;ABCG43;;;YR1;;;;;OsLRR;;;Cht11;;WRKY76;OsPR4c;;OsPR4b;;;OsLOX8;;;WRKY62;
34	GO:0004497	MF	monooxygenase activity	34/ 585	691/ 32702	0.0492041	1.22583e-06	0.000609032	Os08g0507100;Os06g0568600;Os10g0439924;Os10g0439800;Os08g0508000;Os01g0627600;Os03g0371300;Os11g0483000;Os02g0569400;Os10g0512400;Os01g0561600;Os02g0571900;Os07g0416600;Os04g0223500;Os01g0627900;Os08g0547951;Os01g0602400;Os01g0356951;Os12g0512800;Os06g0671375;Os03g0570100;Os04g0180400;Os02g0569000;Os04g0178400;Os07g0482900;Os07g0518100;Os01g0728300;Os10g0139700;Os02g0569900;Os09g0451400;Os06g0569…	CYP76M10;OsKO5;Oscyp71Z8;Oscyp71Z4;CYP76M2;OsCYP72A19;CYP72A1;;CYP76M8;CYP84A5;CYP76M14;CYP76M6;;;;;OsCYP72A32;;OsCYP71E5;;;CYP99A2;CYP76M5;;;;;;OsCYP76M7;ACO2;KO4;CYP71Z2;AOS2;
38	GO:0016705	MF	oxidoreductase activity, acting on paired donors, with incorporation or reduction of molecular oxygen	38/ 585	770/ 32702	0.0493506	1.37487e-06	0.000612396	Os08g0507100;Os06g0568600;Os10g0439924;Os10g0439800;Os10g0536400;Os08g0508000;Os01g0627600;Os03g0371300;Os11g0483000;Os02g0569400;Os10g0512400;Os01g0561600;Os07g0417200;Os02g0571900;Os04g0581000;Os07g0416600;Os04g0223500;Os01g0627900;Os08g0547951;Os01g0602400;Os01g0356951;Os12g0512800;Os06g0671375;Os03g0570100;Os04g0180400;Os02g0569000;Os04g0178400;Os07g0482900;Os07g0518100;Os01g0728300;Os10g0139…	CYP76M10;OsKO5;Oscyp71Z8;Oscyp71Z4;OsF3H-2;CYP76M2;OsCYP72A19;CYP72A1;;CYP76M8;CYP84A5;CYP76M14;OsFAD2-2;CYP76M6;;;;;;OsCYP72A32;;OsCYP71E5;;;CYP99A2;CYP76M5;;;;;;OsCYP76M7;ACO2;;KO4;CYP71Z2;AOS2;
63	GO:0006468	BP	protein phosphorylation	63/ 585	1312/ 32702	0.0480183	1.7942e-06	0.000627533	Os07g0130800;Os01g0742400;Os04g0509000;Os11g0666200;Os01g0670100;Os09g0570100;Os07g0131375;Os07g0541200;Os10g0142600;Os07g0540500;Os07g0150700;Os09g0551400;Os11g0608300;Os07g0597200;Os03g0772600;Os10g0327000;Os01g0816600;Os01g0115600;Os04g0356600;Os12g0130200;Os02g0640500;Os09g0353200;Os07g0686800;Os08g0457400;Os05g0522600;Os01g0137950;Os02g0231700;Os06g0586150;Os01g0152000;Os02g0227700;Os02g0135…	;;;OsRLCK345;;OsRLCK282;;;OsWAK101;OsRLCK236;CIPK23;;OsRLCK337;;;;;OsRLCK11;;;SIT1;;OsRLCK241;OsRLCK255;;OsRLCK23;;;;OsRLK5;OsMPK13;;OsWAK123;OsRLCK336;RLCK103;OsWAK95;;;OsRLCK346;;;OsRLCK369;OsWAK81;;;;;OsNPK1-PK;;;OsWAK2;;OsRLCK353;;;;;OsRLCK348;;;OsWAK87;OsRLCK251;OsRLCK110
35	GO:0098542	BP	defense response to other organism	35/ 585	798/ 32702	0.0438596	1.80845e-06	0.000627533	Os07g0130800;Os01g0194300;Os07g0131375;Os12g0481400;Os11g0227700;Os09g0313600;Os08g0485800;Os11g0598300;Os07g0597200;Os03g0772600;Os09g0314200;Os02g0640500;Os11g0673600;Os11g0229600;Os06g0267900;Os02g0181300;Os08g0514000;Os01g0864500;Os06g0726200;Os11g0226933;Os07g0522500;Os11g0229300;Os09g0472700;Os05g0492200;Os11g0227800;Os02g0282000;Os11g0227200;Os04g0288500;Os11g0211400;Os03g0132900;Os10g0542…	;NH1;;;;;;;;;;SIT1;YR2;;;WRKY71;;OsSDS1;Cht1*(Chi1);;ABCG43;;;YR1;;;OsLRR;;;Cht11;Cht8;OsPR4c;OsPR4b;;
59	GO:0044419	BP	biological process involved in interspecies interaction between organisms	59/ 585	1363/ 32702	0.0432869	1.81583e-06	0.000627533	Os07g0130800;Os01g0915900;Os01g0194300;Os04g0205200;Os01g0670100;Os07g0131375;Os12g0481400;Os11g0227700;Os09g0313600;Os08g0485800;Os11g0598300;Os09g0551400;Os01g0670300;Os07g0597200;Os03g0772600;Os09g0314200;Os01g0721200;Os04g0356600;Os10g0473950;Os01g0870750;Os02g0640500;Os01g0160800;Os08g0508800;Os11g0673600;Os11g0229600;Os06g0267900;Os01g0721400;Os06g0698802;Os02g0181300;Os06g0649000;Os08g0514…	;;NH1;;;;;;;;;;;;;;;;;;SIT1;;Lox2:Os:1;YR2;;;;;WRKY71;WRKY28;;OsSDS1;Cht1*(Chi1);;Cht8;ABCG43;;;YR1;;;;;OsLRR;;;Cht11;;WRKY76;OsPR4c;;OsPR4b;;;OsLOX8;;;WRKY62;
62	GO:0009607	BP	response to biotic stimulus	62/ 585	1380/ 32702	0.0449275	2.07621e-06	0.000627533	Os07g0130800;Os01g0915900;Os01g0194300;Os04g0205200;Os01g0670100;Os07g0131375;Os12g0481400;Os11g0598300;Os11g0227700;Os09g0313600;Os08g0485800;Os04g0288500;Os09g0551400;Os01g0670300;Os07g0597200;Os03g0772600;Os09g0314200;Os01g0721200;Os04g0356600;Os10g0473950;Os01g0870750;Os02g0640500;Os08g0508800;Os11g0673600;Os11g0229600;Os06g0267900;Os01g0721400;Os06g0698802;Os01g0382000;Os02g0181300;Os06g0649…	;;NH1;;;;;;;;;;;;;;;;;;;SIT1;Lox2:Os:1;YR2;;;;;OsPR1b;WRKY71;WRKY28;;OsSDS1;Cht1*(Chi1);;Cht8;ABCG43;;;YR1;;;;;;OsLRR;OsMLO10;;Cht11;;WRKY76;OsPR4c;;OsPR4b;;;OsLOX8;OsPR1;;PR1A;WRKY62;
32	GO:0005506	MF	iron ion binding	32/ 585	703/ 32702	0.0455192	1.76416e-06	0.000627533	Os08g0507100;Os06g0568600;Os10g0439924;Os10g0439800;Os08g0508000;Os01g0627600;Os03g0371300;Os11g0483000;Os02g0569400;Os10g0512400;Os01g0561600;Os02g0571900;Os07g0416600;Os01g0627900;Os08g0547951;Os01g0602400;Os12g0512800;Os06g0671375;Os03g0570100;Os04g0180400;Os02g0569000;Os04g0178400;Os07g0482900;Os10g0419400;Os07g0518100;Os01g0728300;Os10g0139700;Os02g0569900;Os06g0569500;Os07g0217600;Os03g0225…	CYP76M10;OsKO5;Oscyp71Z8;Oscyp71Z4;CYP76M2;OsCYP72A19;CYP72A1;;CYP76M8;CYP84A5;CYP76M14;CYP76M6;;;;OsCYP72A32;OsCYP71E5;;;CYP99A2;CYP76M5;;;SIP2;;;;OsCYP76M7;KO4;CYP71Z2;AOS2;
60	GO:0009605	BP	response to external stimulus	60/ 585	1528/ 32702	0.039267	2.34397e-06	0.000638592	Os07g0130800;Os01g0915900;Os01g0194300;Os04g0205200;Os01g0670100;Os07g0131375;Os12g0481400;Os11g0598300;Os11g0227700;Os09g0313600;Os08g0485800;Os07g0150700;Os09g0551400;Os01g0670300;Os07g0597200;Os03g0772600;Os09g0314200;Os01g0721200;Os04g0356600;Os10g0473950;Os01g0870750;Os02g0640500;Os08g0508800;Os11g0673600;Os11g0229600;Os06g0267900;Os01g0721400;Os06g0698802;Os02g0181300;Os06g0649000;Os08g0514…	;;NH1;;;;;;;;;CIPK23;;;;;;;;;;SIT1;Lox2:Os:1;YR2;;;;;WRKY71;WRKY28;;OsSDS1;Cht1*(Chi1);OsGDH3;;Cht8;ABCG43;;;YR1;;;;;OsLRR;;;Cht11;;WRKY76;OsPR4c;;OsPR4b;;;OsLOX8;;;WRKY62;
112	GO:0006950	BP	response to stress	112/ 585	3039/ 32702	0.0368542	2.47357e-06	0.000638592	Os01g0915900;Os12g0533550;Os11g0598300;Os07g0597200;Os12g0491800;Os12g0629700;Os02g0571900;Os06g0267900;Os06g0599200;Os01g0382000;Os06g0698802;Os11g0226933;Os11g0227700;Os11g0229300;Os09g0313600;Os02g0569000;Os02g0282000;Os11g0227200;Os10g0542900;Os11g0592000;Os06g0215900;Os11g0598500;Os12g0406000;Os12g0555500;Os04g0517100;Os01g0963000;Os09g0467200;Os09g0456800;Os07g0130800;Os09g0571200;Os01g0721…	;;;;OsKSL10;;CYP76M6;;;OsPR1b;;;;;;CYP76M5;;OsLRR;Cht8;OsPR4c;OsOPR4;;;OsPR10a;OsMyb4;prx22;OsGSTU17;HSFB1;;;;OsJAZ2;ONAC045;CYP76M8;;WRKY45;;Oc2*;;;WRKY71;WRKY28;;OsLEA25;OsLOX8;OsPR5;;Rpp17;;;OsTIFY11d;;;;;OsPR5;OsPR4b;OsCYP76M7;OCPI2;WRKY62;;;CIPK23;SnRK2;;;;SIT1;Lox2:Os:1;YR2;;RPR10b;OsGDH3;ABCG43;PR10;;OsCPS4;YR1;;CYP99A2;;Cht11;;prx62;;OsLP;ZFP36;ClpD1;NH1;TLP;;RSOsPR10;;;OsKS4;;;;OsSDS1;Ch…
78	GO:0004672	MF	protein kinase activity	78/ 585	2479/ 32702	0.0314643	2.61837e-06	0.000638592	Os07g0130800;Os01g0742400;Os04g0509000;Os11g0666200;Os01g0670100;Os09g0570100;Os07g0131375;Os07g0541200;Os10g0142600;Os07g0540500;Os07g0150700;Os09g0551400;Os11g0608300;Os07g0597200;Os03g0772600;Os10g0327000;Os01g0137875;Os01g0115600;Os04g0356600;Os12g0130200;Os01g0870750;Os01g0115566;Os01g0816600;Os04g0430600;Os09g0353200;Os05g0261700;Os07g0686800;Os12g0182333;Os08g0457400;Os05g0522600;Os01g0137…	;;;OsRLCK345;;OsRLCK282;;;OsWAK101;OsRLCK236;CIPK23;;OsRLCK337;;;;;OsRLCK11;;;;OsRLCK10;;;;;OsRLCK241;;OsRLCK255;;OsRLCK23;;;;;OsRLK5;OsMPK13;;OsWAK123;OsRLCK336;WAK14;RLCK103;OsWAK95;;;;;;HDAC2;OsRLCK346;SIT1;;OsRLCK369;OsWAK81;;;;;;;OsNPK1-PK;;;OsWAK2;;LYP2;;OsRLCK353;;;;;OsRLCK348;;;OsWAK87;OsRLCK251;OsRLCK110
152	GO:0050896	BP	response to stimulus	152/ 585	4414/ 32702	0.0344359	3.09605e-06	0.000671844	Os01g0915900;Os12g0533550;Os01g0370900;Os09g0551400;Os07g0597200;Os01g0730700;Os12g0491800;Os12g0629700;Os02g0571900;Os06g0267900;Os01g0721400;Os01g0382000;Os06g0698802;Os02g0649900;Os11g0226933;Os11g0227700;Os01g0584900;Os11g0229300;Os01g0591300;Os09g0313600;Os01g0587400;Os02g0569000;Os02g0282000;Os11g0227200;Os10g0542900;Os11g0592000;Os12g0406000;Os05g0183100;Os11g0598500;Os06g0215900;Os12g0555…	;;OsGSTF8;;;OsWRKY14;OsKSL10;;CYP76M6;;;OsPR1b;;YSL2;;;OsWRKY77;;OsALDH2C1;;;CYP76M5;;OsLRR;Cht8;OsPR4c;;OsWRKY67;;OsOPR4;OsPR10a;OsMyb4;prx22;OsGSTU17;OsWRKY9;HSFB1;;;;OsJAZ2;ONAC045;;CYP76M8;;WRKY45;WRKY53;;;OsSAUR17;OsMST4;Oc2*;;;WRKY71;WRKY28;;OsLEA25;OsLOX8;OsWRKY1;OsPR5;;Rpp17;;;SAUR39;;OsTIFY11d;;;WRKY76;;OsWRKY32;;OsPR5;OsPR4b;OsCYP76M7;OsGSTU6;WRKY47;OCPI2;WRKY62;OsWRKY69;;OsWRKY70;OsWRK…
136	GO:0032559	MF	adenyl ribonucleotide binding	136/ 585	5049/ 32702	0.026936	3.43094e-06	0.000675804	Os01g0742400;Os01g0915900;Os11g0161133;Os11g0666200;Os09g0313600;Os11g0598300;Os09g0551400;Os07g0597200;Os01g0137875;Os01g0115600;Os01g0115566;Os06g0267900;Os02g0135200;Os06g0698802;Os11g0226933;Os03g0326000;Os11g0227700;Os11g0229300;Os01g0690600;Os05g0550800;Os05g0258400;Os08g0398300;Os01g0587400;Os02g0282000;Os11g0227200;Os01g0136900;Os12g0406000;Os11g0691280;Os11g0598500;Os03g0326200;Os03g0407…	;;;OsRLCK345;;;;;;OsRLCK11;OsRLCK10;;OsMPK13;;;;;;;;;OsABCA4;;;OsLRR;;;OsRLCK353;;;OsRLCK110;;;OsRLCK282;;;;;;OsABCC16;;;OsABCG44;;4CL5;WAK14;;;;;OsRLCK369;;;;OsABCC10;;OsWAK2;LYP2;;OsPPi-PFK;;;OsRLCK348;;OsPDR8;WRKY62;;;OsWAK101;CIPK23;SnRK2;;;OsPDR9;SIT1;;YR2;OsRLCK241;OsRLCK255;;OsRLK5;RLCK103;ABCG43;;;YR1;;;OsRLCK336;;OsWAK81;OsWAK123;;;OsRLCK23;;OsABCC9;OsWAK95;;;OsRLCK337;OsWAK87;;ClpD1;;;;…
20	GO:0007166	BP	cell surface receptor signaling pathway	20/ 585	339/ 32702	0.0589971	3.86449e-06	0.000688996	Os07g0130800;Os10g0111400;Os02g0640500;Os11g0691280;Os11g0666200;Os11g0661800;Os05g0550800;Os04g0371000;Os10g0142600;Os11g0667000;Os07g0131375;Os09g0471400;Os11g0667700;Os11g0691400;Os11g0694100;Os03g0141100;Os09g0482640;Os04g0370900;Os02g0632800;Os08g0343000	;OsWAK95;SIT1;OsRLCK353;OsRLCK345;;;;OsWAK101;OsRLCK346;;OsWAK81;OsRLCK348;;OsWAK123;;OsWAK87;;WAK14;OsRLCK251
140	GO:0030554	MF	adenyl nucleotide binding	140/ 585	5260/ 32702	0.026616	3.79051e-06	0.000688996	Os01g0742400;Os01g0915900;Os11g0161133;Os11g0666200;Os09g0313600;Os11g0598300;Os09g0551400;Os07g0597200;Os01g0137875;Os01g0115600;Os01g0115566;Os04g0223500;Os06g0267900;Os02g0135200;Os06g0698802;Os01g0356951;Os11g0226933;Os03g0326000;Os11g0227700;Os11g0229300;Os01g0690600;Os05g0550800;Os05g0258400;Os08g0398300;Os01g0587400;Os02g0282000;Os11g0227200;Os01g0136900;Os12g0406000;Os11g0691280;Os11g0598…	;;;OsRLCK345;;;;;;OsRLCK11;OsRLCK10;;;OsMPK13;;;;;;;;;;OsABCA4;;;OsLRR;;;OsRLCK353;;;OsRLCK110;;;OsRLCK282;;;;;;;;OsABCC16;;;OsABCG44;;4CL5;WAK14;;;;;OsRLCK369;;;;OsABCC10;;OsWAK2;LYP2;;OsPPi-PFK;;;OsRLCK348;;OsPDR8;WRKY62;;;OsWAK101;CIPK23;SnRK2;;;OsPDR9;SIT1;;YR2;OsRLCK241;OsRLCK255;;OsRLK5;RLCK103;ABCG43;;;YR1;;;OsRLCK336;;OsWAK81;OsWAK123;;;OsRLCK23;;OsABCC9;OsWAK95;;;OsRLCK337;OsWAK87;;ClpD1…
161	GO:0043168	MF	anion binding	161/ 585	6175/ 32702	0.0260729	4.15631e-06	0.000714403	Os01g0742400;Os01g0915900;Os11g0161133;Os11g0666200;Os09g0313600;Os01g0370900;Os02g0306401;Os07g0597200;Os11g0587600;Os01g0137875;Os01g0115600;Os01g0115566;Os04g0223500;Os06g0267900;Os01g0137950;Os08g0140300;Os02g0135200;Os06g0698802;Os01g0356951;Os11g0226933;Os03g0326000;Os11g0227700;Os11g0229300;Os01g0690600;Os06g0549900;Os05g0258400;Os08g0398300;Os01g0587400;Os02g0282000;Os11g0227200;Os05g0228…	;;;OsRLCK345;;OsGSTF8;OsNAAT1;;OsABCG48;;OsRLCK11;OsRLCK10;;;OsRLCK23;TDC1;OsMPK13;;;;;;;;;;OsABCA4;;;OsLRR;;OsProDH;;;OsRLCK353;;OsOPR4;OsPR10a;;SnRK2;OsRLCK110;;;OsRLCK282;;;;;;OsABCC16;;;OsABCG44;;4CL5;WAK14;;OsWAK95;;;;;OsRLCK369;;;;OsABCC10;;OsWAK2;LYP2;;OsPPi-PFK;;;OsRLCK348;ACO2;;OsPDR8;WRKY62;;;OsWAK101;CIPK23;;;;;OsPDR9;OsTDC3;SIT1;;YR2;OsRLCK241;OsGSTF5;OsRLCK255;;;OsRLK5;RPR10b;RLCK103…
258	GO:0043167	MF	ion binding	258/ 585	10897/ 32702	0.0236762	4.82892e-06	0.000785907	Os08g0507100;Os01g0742400;Os01g0915900;Os11g0161133;Os11g0666200;Os12g0257600;Os09g0313600;Os01g0370900;Os02g0306401;Os07g0597200;Os11g0587600;Os12g0491800;Os10g0512400;Os01g0137875;Os01g0115600;Os06g0683400;Os02g0571900;Os02g0252400;Os03g0743500;Os01g0115566;Os04g0581000;Os07g0416600;Os04g0223500;Os06g0267900;Os01g0721400;Os03g0236200;Os04g0600300;Os02g0582600;Os08g0140300;Os02g0135200;Os09g0271…	CYP76M10;;;;OsRLCK345;OsLAC28;;OsGSTF8;OsNAAT1;;OsABCG48;OsKSL10;CYP84A5;;OsRLCK11;OsCCD1;CYP76M6;RPBF;OsCML4;OsRLCK10;;;;;;OsGAD3;AOX1B;;TDC1;OsMPK13;;;;;;OsCYP71E5;;;;;;;;OsABCA4;;CYP76M5;;OsLRR;OsABCC16;OsCYP76M7;;OsProDH;;;OsLAC7;OsOPR4;OsRLCK353;;;;OsPR10a;;SnRK2;OsLOX8;prx22;CYP71Z2;OsRLCK251;OsRLCK110;AOS2;4CL5;;OsKO5;Oscyp71Z8;;;OsRLCK282;;KO4;CYP72A1;;;;CYP76M8;;CYP76M14;;;OsMT1a;;OsS3H;…
3	GO:0036202	MF	ent-cassa-12,15-diene 11-hydroxylase activity	3/ 585	3/ 32702	1	5.69579e-06	0.000860777	Os06g0599200;Os02g0569900;Os02g0569400	;OsCYP76M7;CYP76M8
160	GO:0036094	MF	small molecule binding	160/ 585	6271/ 32702	0.0255143	6.09287e-06	0.000904631	Os01g0742400;Os01g0915900;Os11g0161133;Os11g0666200;Os09g0313600;Os11g0598300;Os02g0306401;Os07g0597200;Os01g0137875;Os01g0115600;Os01g0115566;Os04g0223500;Os06g0267900;Os01g0137950;Os08g0140300;Os02g0135200;Os06g0698802;Os01g0356951;Os11g0226933;Os03g0326000;Os11g0227700;Os11g0229300;Os01g0690600;Os06g0549900;Os05g0258400;Os08g0398300;Os01g0587400;Os02g0282000;Os11g0227200;Os05g0228000;Os10g0550…	;;;OsRLCK345;;;OsNAAT1;;;OsRLCK11;OsRLCK10;;;OsRLCK23;TDC1;OsMPK13;;;;;;;;;;OsABCA4;;;OsLRR;;OsProDH;;;OsRLCK353;;OsOPR4;OsPR10a;;SnRK2;OsRLCK110;;;OsRLCK282;;;;;;;;OsABCC16;;;OsABCG44;;4CL5;WAK14;;OsWAK95;;;;OsRLCK369;;;;OsABCC10;;OsWAK2;LYP2;;OsPPi-PFK;;;OsRLCK348;ACO2;;OsPDR8;WRKY62;;;OsWAK101;CIPK23;;;;;;OsPDR9;OsTDC3;SIT1;;YR2;OsRLCK241;OsRLCK255;;;OsRLK5;RPR10b;OsGDH3;ABCG43;PR10;;;YR1;;;Os…
4	GO:0010200	BP	response to chitin	4/ 585	8/ 32702	0.5	6.7018e-06	0.000977885	Os09g0417600;Os06g0649000;Os09g0417800;Os02g0181300	WRKY76;WRKY28;WRKY62;WRKY71
142	GO:0097367	MF	carbohydrate derivative binding	142/ 585	5516/ 32702	0.0257433	7.55568e-06	0.00108379	Os01g0742400;Os01g0915900;Os11g0161133;Os11g0666200;Os09g0313600;Os11g0598300;Os09g0551400;Os07g0597200;Os01g0137875;Os01g0115600;Os01g0115566;Os06g0267900;Os02g0135200;Os06g0698802;Os11g0226933;Os03g0326000;Os11g0227700;Os11g0229300;Os01g0690600;Os05g0550800;Os05g0258400;Os08g0398300;Os01g0587400;Os02g0282000;Os11g0227200;Os05g0228000;Os01g0136900;Os12g0406000;Os11g0691280;Os11g0598500;Os06g0215…	;;;OsRLCK345;;;;;;OsRLCK11;OsRLCK10;;OsMPK13;;;;;;;;;OsABCA4;;;OsLRR;;;;OsRLCK353;;OsOPR4;SnRK2;OsRLCK110;;;OsRLCK282;;;;;;OsABCC16;;;OsABCG44;;4CL5;WAK14;;;;;OsRLCK369;;;;;;OsWAK2;LYP2;;OsPPi-PFK;;;OsRLCK348;;OsPDR8;WRKY62;;;OsWAK101;CIPK23;;;;OsPDR9;SIT1;;YR2;OsRLCK241;OsRLCK255;;OsRLK5;RLCK103;ABCG43;;;YR1;;;OsRLCK336;;OsWAK81;OsWAK123;;;OsRLCK23;;OsABCC9;OsWAK95;;;OsRLCK337;OsWAK87;;ClpD1;;;;…
17	GO:0006720	BP	isoprenoid metabolic process	17/ 585	269/ 32702	0.063197	8.32345e-06	0.00117402	Os04g0180400;Os07g0190000;Os06g0599200;Os12g0435200;Os04g0179700;Os02g0569400;Os06g0568600;Os04g0178300;Os07g0217600;Os02g0569900;Os02g0569000;Os02g0181300;Os04g0178400;Os12g0491800;Os01g0561600;Os06g0569500;Os02g0571900	CYP99A2;OsDXS;;OsNCED2;OsKS4;CYP76M8;OsKO5;OsCPS4;CYP71Z2;OsCYP76M7;CYP76M5;WRKY71;;OsKSL10;CYP76M14;KO4;CYP76M6
57	GO:0004674	MF	protein serine/threonine kinase activity	57/ 585	1720/ 32702	0.0331395	8.67865e-06	0.00120406	Os07g0130800;Os01g0742400;Os04g0509000;Os11g0666200;Os01g0670100;Os07g0131375;Os07g0541200;Os07g0540500;Os07g0150700;Os09g0551400;Os11g0608300;Os03g0772600;Os10g0327000;Os01g0137875;Os04g0356600;Os12g0130200;Os01g0870750;Os02g0640500;Os01g0816600;Os09g0353200;Os05g0261700;Os05g0522600;Os01g0137950;Os06g0586150;Os05g0253200;Os02g0227700;Os02g0135200;Os08g0514000;Os11g0694100;Os11g0607900;Os02g0632…	;;;OsRLCK345;;;;OsRLCK236;CIPK23;;OsRLCK337;;;;;;;SIT1;;;;;OsRLCK23;;;OsRLK5;OsMPK13;;OsWAK123;OsRLCK336;WAK14;RLCK103;OsWAK95;;;;OsRLCK346;;OsWAK81;;;;;OsNPK1-PK;;LYP2;;OsRLCK353;;;;OsRLCK348;;;OsWAK87;OsRLCK251;OsRLCK110
35	GO:0020037	MF	heme binding	35/ 585	855/ 32702	0.0409357	8.87694e-06	0.0012117	Os08g0507100;Os06g0568600;Os10g0439924;Os10g0439800;Os02g0765900;Os08g0508000;Os01g0627600;Os03g0371300;Os11g0483000;Os02g0569400;Os10g0512400;Os01g0561600;Os02g0571900;Os07g0416600;Os01g0627900;Os08g0547951;Os01g0602400;Os12g0512800;Os02g0649800;Os06g0671375;Os03g0570100;Os04g0180400;Os02g0569000;Os04g0178400;Os07g0482900;Os06g0569500;Os04g0688500;Os07g0518100;Os01g0728300;Os10g0139700;Os02g0569…	CYP76M10;OsKO5;Oscyp71Z8;Oscyp71Z4;;CYP76M2;OsCYP72A19;CYP72A1;;CYP76M8;CYP84A5;CYP76M14;CYP76M6;;;;OsCYP72A32;OsCYP71E5;;;;CYP99A2;CYP76M5;;;KO4;prx62;;;;OsCYP76M7;prx22;CYP71Z2;AOS2;
139	GO:0032555	MF	purine ribonucleotide binding	139/ 585	5407/ 32702	0.0257074	1.08207e-05	0.00145358	Os01g0742400;Os01g0915900;Os11g0161133;Os11g0666200;Os09g0313600;Os11g0598300;Os09g0551400;Os07g0597200;Os01g0137875;Os01g0115600;Os01g0115566;Os06g0267900;Os02g0135200;Os06g0698802;Os11g0226933;Os03g0326000;Os11g0227700;Os11g0229300;Os01g0690600;Os05g0550800;Os05g0258400;Os08g0398300;Os01g0587400;Os02g0282000;Os11g0227200;Os05g0228000;Os01g0136900;Os12g0406000;Os11g0691280;Os11g0598500;Os04g0629…	;;;OsRLCK345;;;;;;OsRLCK11;OsRLCK10;;OsMPK13;;;;;;;;;OsABCA4;;;OsLRR;;;;OsRLCK353;;SnRK2;OsRLCK110;;;OsRLCK282;;;;;;OsABCC16;;;OsABCG44;;4CL5;WAK14;;;;;OsRLCK369;;;;OsABCC10;;OsWAK2;LYP2;;OsPPi-PFK;;;OsRLCK348;;OsPDR8;WRKY62;;;OsWAK101;CIPK23;;;;OsPDR9;SIT1;;YR2;OsRLCK241;OsRLCK255;;OsRLK5;RLCK103;ABCG43;;;YR1;;;OsRLCK336;;OsWAK81;OsWAK123;;;OsRLCK23;;OsABCC9;OsWAK95;;;OsRLCK337;OsWAK87;;ClpD1;;;…
143	GO:0017076	MF	purine nucleotide binding	143/ 585	5618/ 32702	0.0254539	1.14979e-05	0.00152042	Os01g0742400;Os01g0915900;Os11g0161133;Os11g0666200;Os09g0313600;Os11g0598300;Os09g0551400;Os07g0597200;Os01g0137875;Os01g0115600;Os01g0115566;Os04g0223500;Os06g0267900;Os02g0135200;Os06g0698802;Os01g0356951;Os11g0226933;Os03g0326000;Os11g0227700;Os11g0229300;Os01g0690600;Os05g0550800;Os05g0258400;Os08g0398300;Os01g0587400;Os02g0282000;Os11g0227200;Os05g0228000;Os01g0136900;Os12g0406000;Os11g0691…	;;;OsRLCK345;;;;;;OsRLCK11;OsRLCK10;;;OsMPK13;;;;;;;;;;OsABCA4;;;OsLRR;;;;OsRLCK353;;SnRK2;OsRLCK110;;;OsRLCK282;;;;;;;;OsABCC16;;;OsABCG44;;4CL5;WAK14;;;;;OsRLCK369;;;;OsABCC10;;OsWAK2;LYP2;;OsPPi-PFK;;;OsRLCK348;;OsPDR8;WRKY62;;;OsWAK101;CIPK23;;;;OsPDR9;SIT1;;YR2;OsRLCK241;OsRLCK255;;OsRLK5;RLCK103;ABCG43;;;YR1;;;OsRLCK336;;OsWAK81;OsWAK123;;;OsRLCK23;;OsABCC9;OsWAK95;;;OsRLCK337;OsWAK87;;ClpD…
140	GO:0032553	MF	ribonucleotide binding	140/ 585	5473/ 32702	0.0255801	1.19886e-05	0.00156092	Os01g0742400;Os01g0915900;Os11g0161133;Os11g0666200;Os09g0313600;Os11g0598300;Os09g0551400;Os07g0597200;Os01g0137875;Os01g0115600;Os01g0115566;Os06g0267900;Os02g0135200;Os06g0698802;Os11g0226933;Os03g0326000;Os11g0227700;Os11g0229300;Os01g0690600;Os05g0550800;Os05g0258400;Os08g0398300;Os01g0587400;Os02g0282000;Os11g0227200;Os05g0228000;Os01g0136900;Os12g0406000;Os11g0691280;Os11g0598500;Os06g0215…	;;;OsRLCK345;;;;;;OsRLCK11;OsRLCK10;;OsMPK13;;;;;;;;;OsABCA4;;;OsLRR;;;;OsRLCK353;;OsOPR4;SnRK2;OsRLCK110;;;OsRLCK282;;;;;;OsABCC16;;;OsABCG44;;4CL5;WAK14;;;;;OsRLCK369;;;;OsABCC10;;OsWAK2;LYP2;;OsPPi-PFK;;;OsRLCK348;;OsPDR8;WRKY62;;;OsWAK101;CIPK23;;;;OsPDR9;SIT1;;YR2;OsRLCK241;OsRLCK255;;OsRLK5;RLCK103;ABCG43;;;YR1;;;OsRLCK336;;OsWAK81;OsWAK123;;;OsRLCK23;;OsABCC9;OsWAK95;;;OsRLCK337;OsWAK87;;C…
20	GO:0019748	BP	secondary metabolic process	20/ 585	369/ 32702	0.0542005	1.34712e-05	0.00167656	Os04g0179100;Os06g0568600;Os08g0448000;Os10g0512400;Os02g0626532;Os12g0257600;Os05g0427400;Os12g0258700;Os11g0641500;Os11g0566800;Os10g0346300;Os01g0850550;Os02g0569900;Os02g0569000;Os02g0569400;Os06g0569500;Os01g0561600;Os02g0571900;Os06g0599200;Os04g0674700	OsSDR110C-MS2;OsKO5;4CL5;CYP84A5;;OsLAC28;OsPAL04;OsLAC29;OsLAC23;OsPKS27;OsLAC17;OsLAC7;OsCYP76M7;CYP76M5;CYP76M8;KO4;CYP76M14;CYP76M6;;
79	GO:0016773	MF	phosphotransferase activity, alcohol group as acceptor	79/ 585	2693/ 32702	0.0293353	1.32763e-05	0.00167656	Os07g0130800;Os01g0742400;Os04g0509000;Os11g0666200;Os01g0670100;Os09g0570100;Os07g0131375;Os07g0541200;Os10g0142600;Os07g0540500;Os05g0194900;Os07g0150700;Os09g0551400;Os11g0608300;Os07g0597200;Os03g0772600;Os10g0327000;Os01g0137875;Os01g0115600;Os04g0356600;Os12g0130200;Os01g0870750;Os01g0115566;Os01g0816600;Os04g0430600;Os09g0353200;Os05g0261700;Os07g0686800;Os12g0182333;Os08g0457400;Os05g0522…	;;;OsRLCK345;;OsRLCK282;;;OsWAK101;OsRLCK236;OsPPi-PFK;CIPK23;;OsRLCK337;;;;;OsRLCK11;;;;OsRLCK10;;;;;OsRLCK241;;OsRLCK255;;OsRLCK23;;;;;OsRLK5;OsMPK13;;OsWAK123;OsRLCK336;WAK14;RLCK103;OsWAK95;;;;;;HDAC2;OsRLCK346;SIT1;;OsRLCK369;OsWAK81;;;;;;;OsNPK1-PK;;;OsWAK2;;LYP2;;OsRLCK353;;;;;OsRLCK348;;;OsWAK87;OsRLCK251;OsRLCK110
78	GO:0016491	MF	oxidoreductase activity	78/ 585	2647/ 32702	0.0294673	1.5664e-05	0.00189378	Os08g0507100;Os04g0179100;Os06g0568600;Os10g0439924;Os10g0439800;Os12g0257600;Os04g0447700;Os10g0139700;Os10g0536400;Os08g0158200;Os08g0508000;Os08g0137800;Os03g0371300;Os09g0572700;Os01g0850550;Os09g0365900;Os11g0483000;Os02g0569400;Os10g0512400;Os01g0561600;Os07g0482900;Os10g0104000;Os07g0417200;Os06g0681200;Os07g0664900;Os10g0502450;Os04g0581000;Os08g0508800;Os07g0416600;Os01g0591300;Os03g0405…	CYP76M10;OsSDR110C-MS2;OsKO5;Oscyp71Z8;Oscyp71Z4;OsLAC28;;;OsF3H-2;;CYP76M2;OsUCL24;CYP72A1;OsUCL33;OsLAC7;OsORAP1;;CYP76M8;CYP84A5;CYP76M14;;;OsFAD2-2;OsENODL18;;;;Lox2:Os:1;;OsALDH2C1;;;;;OsLAC17;;AOX1B;;CYP76M6;OsLOX8;OsGDH3;OsCYP71E5;OsNCED2;OsLAC29;;;OsCYP72A19;CYP99A2;;OsProDH;CYP76M5;;;OsMAS;OsSDR110C-MS3;OsLAC23;;prx62;OsOxO1;SIP2;;OsOPR4;;;;KO4;OsCYP76M7;;ACO2;;prx22;OsCYP72A32;CYP71Z2;O…
35	GO:0046906	MF	tetrapyrrole binding	35/ 585	895/ 32702	0.0391061	1.75015e-05	0.00208613	Os08g0507100;Os06g0568600;Os10g0439924;Os10g0439800;Os02g0765900;Os08g0508000;Os01g0627600;Os03g0371300;Os11g0483000;Os02g0569400;Os10g0512400;Os01g0561600;Os02g0571900;Os07g0416600;Os01g0627900;Os08g0547951;Os01g0602400;Os12g0512800;Os02g0649800;Os06g0671375;Os03g0570100;Os04g0180400;Os02g0569000;Os04g0178400;Os07g0482900;Os06g0569500;Os04g0688500;Os07g0518100;Os01g0728300;Os10g0139700;Os02g0569…	CYP76M10;OsKO5;Oscyp71Z8;Oscyp71Z4;;CYP76M2;OsCYP72A19;CYP72A1;;CYP76M8;CYP84A5;CYP76M14;CYP76M6;;;;OsCYP72A32;OsCYP71E5;;;;CYP99A2;CYP76M5;;;KO4;prx62;;;;OsCYP76M7;prx22;CYP71Z2;AOS2;
3	GO:0102597	MF	3alpha-hydroxy-ent-sandaracopimardiene 9-beta-monooxygenase activity	3/ 585	4/ 32702	0.75	2.2479e-05	0.00264222	Os01g0561600;Os02g0569000;Os02g0571900	CYP76M14;CYP76M5;CYP76M6
148	GO:1901265	MF	nucleoside phosphate binding	148/ 585	5966/ 32702	0.0248072	2.35682e-05	0.00269538	Os01g0742400;Os01g0915900;Os11g0161133;Os11g0666200;Os09g0313600;Os11g0598300;Os09g0551400;Os07g0597200;Os01g0137875;Os01g0115600;Os01g0115566;Os04g0223500;Os06g0267900;Os02g0135200;Os06g0698802;Os01g0356951;Os11g0226933;Os03g0326000;Os11g0227700;Os11g0229300;Os01g0690600;Os06g0549900;Os05g0258400;Os08g0398300;Os01g0587400;Os02g0282000;Os11g0227200;Os05g0228000;Os10g0550900;Os01g0136900;Os12g0406…	;;;OsRLCK345;;;;;;OsRLCK11;OsRLCK10;;;OsMPK13;;;;;;;;;;OsABCA4;;;OsLRR;;OsProDH;;;OsRLCK353;;OsOPR4;SnRK2;OsRLCK110;;;OsRLCK282;;;;;;;;OsABCC16;;;OsABCG44;;4CL5;WAK14;;;;;OsRLCK369;;;;OsABCC10;;OsWAK2;LYP2;;OsPPi-PFK;;;OsRLCK348;;OsPDR8;WRKY62;;;OsWAK101;CIPK23;;;;;;OsPDR9;SIT1;;YR2;OsRLCK241;OsRLCK255;;OsRLK5;OsGDH3;ABCG43;;;YR1;;;OsRLCK336;;OsWAK81;OsWAK123;;;OsRLCK23;;OsABCC9;OsWAK95;;;OsRLCK3…
148	GO:0000166	MF	nucleotide binding	148/ 585	5966/ 32702	0.0248072	2.35682e-05	0.00269538	Os01g0742400;Os01g0915900;Os11g0161133;Os11g0666200;Os09g0313600;Os11g0598300;Os09g0551400;Os07g0597200;Os01g0137875;Os01g0115600;Os01g0115566;Os04g0223500;Os06g0267900;Os02g0135200;Os06g0698802;Os01g0356951;Os11g0226933;Os03g0326000;Os11g0227700;Os11g0229300;Os01g0690600;Os06g0549900;Os05g0258400;Os08g0398300;Os01g0587400;Os02g0282000;Os11g0227200;Os05g0228000;Os10g0550900;Os01g0136900;Os12g0406…	;;;OsRLCK345;;;;;;OsRLCK11;OsRLCK10;;;OsMPK13;;;;;;;;;;OsABCA4;;;OsLRR;;OsProDH;;;OsRLCK353;;OsOPR4;SnRK2;OsRLCK110;;;OsRLCK282;;;;;;;;OsABCC16;;;OsABCG44;;4CL5;WAK14;;;;;OsRLCK369;;;;OsABCC10;;OsWAK2;LYP2;;OsPPi-PFK;;;OsRLCK348;;OsPDR8;WRKY62;;;OsWAK101;CIPK23;;;;;;OsPDR9;SIT1;;YR2;OsRLCK241;OsRLCK255;;OsRLK5;OsGDH3;ABCG43;;;YR1;;;OsRLCK336;;OsWAK81;OsWAK123;;;OsRLCK23;;OsABCC9;OsWAK95;;;OsRLCK3…
14	GO:0008299	BP	isoprenoid biosynthetic process	14/ 585	217/ 32702	0.0645161	4.09622e-05	0.0044444	Os06g0568600;Os06g0599200;Os12g0435200;Os07g0190000;Os04g0179700;Os06g0569500;Os04g0178300;Os07g0217600;Os02g0569900;Os02g0569000;Os02g0569400;Os12g0491800;Os01g0561600;Os02g0571900	OsKO5;;OsNCED2;OsDXS;OsKS4;KO4;OsCPS4;CYP71Z2;OsCYP76M7;CYP76M5;CYP76M8;OsKSL10;CYP76M14;CYP76M6
118	GO:0005524	MF	ATP binding	118/ 585	4586/ 32702	0.0257305	4.07083e-05	0.0044444	Os01g0742400;Os11g0666200;Os11g0598300;Os09g0551400;Os07g0597200;Os01g0137875;Os01g0115600;Os01g0115566;Os02g0135200;Os03g0326000;Os11g0229300;Os01g0690600;Os05g0550800;Os05g0258400;Os08g0398300;Os01g0587400;Os02g0282000;Os11g0227200;Os01g0136900;Os12g0406000;Os11g0691280;Os11g0598500;Os03g0326200;Os03g0407900;Os07g0130800;Os01g0721200;Os09g0570100;Os01g0670300;Os09g0314200;Os01g0816600;Os01g0870…	;OsRLCK345;;;;;OsRLCK11;OsRLCK10;OsMPK13;;;;;;OsABCA4;;;OsLRR;;;OsRLCK353;;;OsRLCK110;;;OsRLCK282;;;;;;OsABCC16;;;OsABCG44;;4CL5;WAK14;;OsWAK95;;;OsRLCK369;;OsABCC10;;OsWAK2;LYP2;;OsPPi-PFK;;OsRLCK348;;;WRKY62;;;OsWAK101;CIPK23;SnRK2;;;OsPDR9;SIT1;;OsRLCK241;OsRLCK255;;OsRLK5;RLCK103;ABCG43;;;YR1;;;OsRLCK336;OsWAK81;OsWAK123;;;OsRLCK23;;OsABCC9;;;OsWAK87;;ClpD1;;;;OsRLCK236;OsABCG48;OsRLCK337;;;;…
5	GO:0080142	BP	regulation of salicylic acid biosynthetic process	5/ 585	23/ 32702	0.217391	4.64044e-05	0.00497114	Os11g0668650;Os12g0556200;Os01g0134700;Os11g0664800;Os12g0556500	;;;;
7	GO:0016682	MF	oxidoreductase activity, acting on diphenols and related substances as donors, oxygen as acceptor	7/ 585	55/ 32702	0.127273	5.45578e-05	0.00570028	Os11g0641500;Os12g0257600;Os12g0258700;Os10g0346300;Os01g0850550;Os04g0600300;Os09g0365900	OsLAC23;OsLAC28;OsLAC29;OsLAC17;OsLAC7;AOX1B;OsORAP1
78	GO:0016310	BP	phosphorylation	78/ 585	2746/ 32702	0.028405	5.96163e-05	0.00614144	Os07g0130800;Os01g0742400;Os11g0514500;Os04g0509000;Os11g0666200;Os01g0670100;Os09g0570100;Os07g0131375;Os04g0633300;Os07g0541200;Os10g0142600;Os07g0540500;Os05g0194900;Os07g0150700;Os09g0551400;Os11g0608300;Os07g0597200;Os03g0772600;Os10g0327000;Os01g0137875;Os01g0115600;Os04g0356600;Os12g0130200;Os01g0870750;Os01g0115566;Os01g0816600;Os04g0430600;Os09g0353200;Os07g0686800;Os12g0182333;Os08g0457…	;;;;OsRLCK345;;OsRLCK282;;;;OsWAK101;OsRLCK236;OsPPi-PFK;CIPK23;;OsRLCK337;;;;;OsRLCK11;;;;OsRLCK10;;;;OsRLCK241;;OsRLCK255;;OsRLCK23;;;;;OsRLK5;OsMPK13;;OsWAK123;OsRLCK336;WAK14;RLCK103;OsWAK95;;;;;OsRLCK346;SIT1;;OsRLCK369;OsWAK81;;;;;;;OsNPK1-PK;;;OsWAK2;OsRLCK251;LYP2;;OsRLCK353;;;;;OsRLCK348;;;OsWAK87;OsBDG1;OsRLCK110
5	GO:0010337	BP	regulation of salicylic acid metabolic process	5/ 585	25/ 32702	0.2	7.11362e-05	0.00695989	Os11g0668650;Os12g0556200;Os01g0134700;Os11g0664800;Os12g0556500	;;;;
12	GO:0009620	BP	response to fungus	12/ 585	178/ 32702	0.0674157	9.43367e-05	0.00897046	Os11g0226933;Os10g0542900;Os01g0194300;Os11g0592000;Os11g0592100;Os09g0417600;Os06g0726200;Os02g0181300;Os06g0649000;Os11g0211400;Os03g0132900;Os09g0417800	;Cht8;NH1;OsPR4c;OsPR4b;WRKY76;Cht1*(Chi1);WRKY71;WRKY28;;Cht11;WRKY62
12	GO:0009617	BP	response to bacterium	12/ 585	178/ 32702	0.0674157	9.43367e-05	0.00897046	Os07g0130800;Os11g0592000;Os02g0640500;Os01g0194300;Os03g0772600;Os11g0592100;Os07g0522500;Os09g0417600;Os07g0131375;Os02g0181300;Os04g0288500;Os09g0417800	;OsPR4c;SIT1;NH1;;OsPR4b;ABCG43;WRKY76;;WRKY71;;WRKY62
4	GO:0140326	MF	ATPase-coupled intramembrane lipid transporter activity	4/ 585	15/ 32702	0.266667	0.000118271	0.0109992	Os03g0326100;Os03g0326000;Os03g0326200;Os05g0100600	;;;
9	GO:0051336	BP	regulation of hydrolase activity	9/ 585	107/ 32702	0.0841121	0.000133684	0.0122975	Os12g0555300;Os05g0494200;Os12g0555000;Os01g0615050;Os12g0555500;Os12g0437800;Os01g0124100;Os01g0615100;Os12g0555200	PR10;Oc2*;RSOsPR10;;OsPR10a;Sci1;RBBI3-2;OCPI2;RPR10b
63	GO:0005886	CC	plasma membrane	63/ 585	2161/ 32702	0.0291532	0.00014157	0.0128829	Os07g0130800;Os01g0742400;Os08g0137800;Os11g0482200;Os04g0401700;Os07g0131375;Os07g0541200;Os10g0142600;Os07g0538000;Os08g0127100;Os09g0572700;Os07g0150700;Os01g0597600;Os07g0597200;Os03g0772600;Os07g0232800;Os02g0640500;Os06g0168500;Os06g0681200;Os03g0326200;Os03g0838400;Os04g0379600;Os04g0370900;Os10g0469700;Os05g0522600;Os01g0940700;Os09g0551400;Os03g0326100;Os01g0713200;Os02g0227700;Os08g0514…	;;OsUCL24;;HAK1;;;OsWAK101;;OsHT;OsUCL33;CIPK23;OsATL15;;;OsZIP8;SIT1;;OsENODL18;;AMT3;;;;;OsPR2;;;Gns10;OsRLK5;;OsWAK123;YSL2;WAK14;;OsWAK95;ABCG43;;;;;;Rpp17;OsFLA7;OsWAK81;;OsMST4;;OsSAP;;;OsAMT2;;OsRLCK353;OsCAT1;;OsGLR1.3;OsNPR4;OsUCL4;OsWAK87;OsRLCK251;;OsSDS1
5	GO:0006586	BP	indolalkylamine metabolic process	5/ 585	29/ 32702	0.172414	0.000149888	0.0133526	Os08g0320400;Os08g0140500;Os07g0182100;Os09g0255400;Os08g0140300	;OsTDC3;OsTSA;IGPS;TDC1
5	GO:0006568	BP	tryptophan metabolic process	5/ 585	29/ 32702	0.172414	0.000149888	0.0133526	Os08g0320400;Os08g0140500;Os07g0182100;Os09g0255400;Os08g0140300	;OsTDC3;OsTSA;IGPS;TDC1
28	GO:0043531	MF	ADP binding	28/ 585	722/ 32702	0.0387812	0.000156219	0.0137717	Os01g0915900;Os04g0205200;Os12g0481400;Os11g0227700;Os09g0313600;Os11g0161700;Os09g0314200;Os01g0721200;Os10g0473950;Os11g0673600;Os11g0229600;Os06g0267900;Os01g0721400;Os06g0698802;Os11g0226933;Os11g0229300;Os05g0492200;Os11g0227800;Os11g0161133;Os07g0116900;Os02g0282000;Os11g0227200;Os11g0211400;Os04g0621700;Os07g0117800;Os11g0492100;Os04g0514600;Os11g0207400	;;;;;;;;;YR2;;;;;;;YR1;;;;;OsLRR;;;;;;
12	GO:0140359	MF	ABC-type transporter activity	12/ 585	189/ 32702	0.0634921	0.000166055	0.0142387	Os01g0609300;Os04g0209300;Os07g0522500;Os04g0209200;Os08g0398300;Os11g0587600;Os01g0342750;Os01g0695800;Os11g0155600;Os08g0384500;Os01g0609900;Os09g0472100	OsPDR9;OsABCC10;ABCG43;OsABCC9;OsABCA4;OsABCG48;;MDR4;OsABCC16;OsABCG44;OsPDR8;OsABCG22
9	GO:0009072	BP	aromatic amino acid metabolic process	9/ 585	112/ 32702	0.0803571	0.00018937	0.0160264	Os07g0182100;Os08g0140500;Os01g0160100;Os02g0626532;Os05g0427400;Os08g0320400;Os02g0306401;Os09g0255400;Os08g0140300	OsTSA;OsTDC3;;;OsPAL04;;OsNAAT1;IGPS;TDC1
4	GO:0140303	MF	intramembrane lipid transporter activity	4/ 585	17/ 32702	0.235294	0.000200435	0.0167949	Os03g0326100;Os03g0326000;Os03g0326200;Os05g0100600	;;;
5	GO:0042435	BP	indole-containing compound biosynthetic process	5/ 585	31/ 32702	0.16129	0.000208225	0.0171423	Os08g0320400;Os08g0140500;Os07g0182100;Os09g0255400;Os08g0140300	;OsTDC3;OsTSA;IGPS;TDC1
81	GO:0016301	MF	kinase activity	81/ 585	2997/ 32702	0.027027	0.000208632	0.0171423	Os07g0130800;Os01g0742400;Os11g0514500;Os04g0509000;Os11g0666200;Os01g0670100;Os09g0570100;Os07g0131375;Os04g0633300;Os07g0541200;Os10g0142600;Os07g0540500;Os05g0194900;Os07g0150700;Os09g0551400;Os11g0608300;Os07g0597200;Os03g0772600;Os10g0327000;Os01g0137875;Os01g0115600;Os04g0356600;Os12g0130200;Os01g0870750;Os01g0115566;Os01g0816600;Os04g0430600;Os09g0353200;Os05g0261700;Os07g0686800;Os12g0182…	;;;;OsRLCK345;;OsRLCK282;;;;OsWAK101;OsRLCK236;OsPPi-PFK;CIPK23;;OsRLCK337;;;;;OsRLCK11;;;;OsRLCK10;;;;;OsRLCK241;;OsRLCK255;;OsRLCK23;;;;;OsRLK5;OsMPK13;;OsWAK123;OsRLCK336;WAK14;RLCK103;OsWAK95;;;;;;HDAC2;OsRLCK346;SIT1;;OsRLCK369;OsWAK81;;;;;;;OsNPK1-PK;;;OsWAK2;OsRLCK251;LYP2;;OsRLCK353;;;;;OsRLCK348;;;OsWAK87;OsBDG1;OsRLCK110
13	GO:0044550	BP	secondary metabolite biosynthetic process	13/ 585	226/ 32702	0.0575221	0.000239136	0.0190925	Os04g0179100;Os06g0568600;Os10g0512400;Os02g0626532;Os05g0427400;Os06g0569500;Os11g0566800;Os02g0569900;Os02g0569000;Os02g0569400;Os01g0561600;Os06g0599200;Os02g0571900	OsSDR110C-MS2;OsKO5;CYP84A5;;OsPAL04;KO4;OsPKS27;OsCYP76M7;CYP76M5;CYP76M8;CYP76M14;;CYP76M6
121	GO:0035639	MF	purine ribonucleoside triphosphate binding	121/ 585	4944/ 32702	0.0244741	0.00029159	0.0230628	Os01g0742400;Os11g0666200;Os11g0598300;Os09g0551400;Os07g0597200;Os01g0137875;Os01g0115600;Os01g0115566;Os02g0135200;Os03g0326000;Os11g0229300;Os01g0690600;Os05g0550800;Os05g0258400;Os08g0398300;Os01g0587400;Os02g0282000;Os11g0227200;Os05g0228000;Os01g0136900;Os12g0406000;Os11g0691280;Os11g0598500;Os03g0326200;Os03g0407900;Os07g0130800;Os01g0721200;Os09g0570100;Os01g0670300;Os09g0314200;Os01g0816…	;OsRLCK345;;;;;OsRLCK11;OsRLCK10;OsMPK13;;;;;;OsABCA4;;;OsLRR;;;;OsRLCK353;;;OsRLCK110;;;OsRLCK282;;;;;;OsABCC16;;;OsABCG44;;4CL5;WAK14;;OsWAK95;;;OsRLCK369;;OsABCC10;;OsWAK2;LYP2;;OsPPi-PFK;;OsRLCK348;;;WRKY62;;;OsWAK101;CIPK23;SnRK2;;;OsPDR9;SIT1;;OsRLCK241;OsRLCK255;;OsRLK5;RLCK103;ABCG43;;;YR1;;;OsRLCK336;OsWAK81;OsWAK123;;;OsRLCK23;;OsABCC9;;;OsWAK87;;ClpD1;;;;OsRLCK236;OsABCG48;OsRLCK337;;;…
5	GO:0046274	BP	lignin catabolic process	5/ 585	34/ 32702	0.147059	0.000326268	0.0238035	Os10g0346300;Os01g0850550;Os12g0258700;Os11g0641500;Os12g0257600	OsLAC17;OsLAC7;OsLAC29;OsLAC23;OsLAC28
5	GO:0046271	BP	phenylpropanoid catabolic process	5/ 585	34/ 32702	0.147059	0.000326268	0.0238035	Os10g0346300;Os01g0850550;Os12g0258700;Os11g0641500;Os12g0257600	OsLAC17;OsLAC7;OsLAC29;OsLAC23;OsLAC28
7	GO:0016679	MF	oxidoreductase activity, acting on diphenols and related substances as donors	7/ 585	72/ 32702	0.0972222	0.000304951	0.0238035	Os11g0641500;Os12g0257600;Os12g0258700;Os10g0346300;Os01g0850550;Os04g0600300;Os09g0365900	OsLAC23;OsLAC28;OsLAC29;OsLAC17;OsLAC7;AOX1B;OsORAP1
2	GO:0102960	MF	momilactone-A synthase activity	2/ 585	2/ 32702	1	0.000319472	0.0238035	Os04g0179100;Os04g0179200	OsSDR110C-MS2;OsMAS
2	GO:0036467	MF	5-hydroxy-L-tryptophan decarboxylase activity	2/ 585	2/ 32702	1	0.000319472	0.0238035	Os08g0140500;Os08g0140300	OsTDC3;TDC1
2	GO:0102596	MF	cytochrome P450 dependent ent-sandaracopimaradiene 3-hydroxylase activity	2/ 585	2/ 32702	1	0.000319472	0.0238035	Os06g0568600;Os06g0569500	OsKO5;KO4
5	GO:0052716	MF	hydroquinone:oxygen oxidoreductase activity	5/ 585	34/ 32702	0.147059	0.000326268	0.0238035	Os10g0346300;Os01g0850550;Os12g0258700;Os11g0641500;Os12g0257600	OsLAC17;OsLAC7;OsLAC29;OsLAC23;OsLAC28
9	GO:0004364	MF	glutathione transferase activity	9/ 585	123/ 32702	0.0731707	0.000381579	0.027367	Os10g0527800;Os01g0369700;Os01g0370900;Os10g0531400;Os01g0558100;Os09g0467200;Os01g0949700;Os03g0283200;Os10g0529500	OsGSTU12;OsGSTF5;OsGSTF8;OsGSTU10;OsGSTU6;OsGSTU17;OsGSTU7;OsGSTL1;OsGSTU30
4	GO:0009753	BP	response to jasmonic acid	4/ 585	20/ 32702	0.2	0.000391013	0.0278079	Os04g0180400;Os02g0181300;Os01g0826400;Os04g0178400	CYP99A2;WRKY71;OsWRKY24;
7	GO:0030414	MF	peptidase inhibitor activity	7/ 585	77/ 32702	0.0909091	0.000461092	0.0322498	Os12g0437800;Os03g0734300;Os05g0494200;Os01g0615050;Os01g0267300;Os01g0124100;Os01g0615100	Sci1;;Oc2*;;OsSRP-QKG;RBBI3-2;OCPI2
7	GO:0004866	MF	endopeptidase inhibitor activity	7/ 585	77/ 32702	0.0909091	0.000461092	0.0322498	Os12g0437800;Os03g0734300;Os05g0494200;Os01g0615050;Os01g0267300;Os01g0124100;Os01g0615100	Sci1;;Oc2*;;OsSRP-QKG;RBBI3-2;OCPI2
4	GO:0070542	BP	response to fatty acid	4/ 585	21/ 32702	0.190476	0.000476215	0.0330345	Os04g0180400;Os02g0181300;Os01g0826400;Os04g0178400	CYP99A2;WRKY71;OsWRKY24;
6	GO:0004568	MF	chitinase activity	6/ 585	56/ 32702	0.107143	0.000485727	0.0334204	Os10g0542900;Os04g0493600;Os01g0687400;Os03g0132900;Os01g0660200;Os06g0726200	Cht8;;;Cht11;C10728;Cht1*(Chi1)
7	GO:0061135	MF	endopeptidase regulator activity	7/ 585	78/ 32702	0.0897436	0.000498852	0.0340467	Os12g0437800;Os03g0734300;Os05g0494200;Os01g0615050;Os01g0267300;Os01g0124100;Os01g0615100	Sci1;;Oc2*;;OsSRP-QKG;RBBI3-2;OCPI2
6	GO:0004867	MF	serine-type endopeptidase inhibitor activity	6/ 585	57/ 32702	0.105263	0.000534763	0.0362051	Os12g0437800;Os03g0734300;Os01g0615050;Os01g0267300;Os01g0124100;Os01g0615100	Sci1;;;OsSRP-QKG;RBBI3-2;OCPI2
7	GO:0061134	MF	peptidase regulator activity	7/ 585	79/ 32702	0.0886076	0.000539034	0.0362051	Os12g0437800;Os03g0734300;Os05g0494200;Os01g0615050;Os01g0267300;Os01g0124100;Os01g0615100	Sci1;;Oc2*;;OsSRP-QKG;RBBI3-2;OCPI2
5	GO:0042430	BP	indole-containing compound metabolic process	5/ 585	39/ 32702	0.128205	0.000627275	0.0418002	Os08g0320400;Os08g0140500;Os07g0182100;Os09g0255400;Os08g0140300	;OsTDC3;OsTSA;IGPS;TDC1
74	GO:0036211	BP	protein modification process	74/ 585	2812/ 32702	0.0263158	0.000782127	0.049768	Os07g0130800;Os01g0742400;Os04g0509000;Os11g0666200;Os01g0670100;Os09g0570100;Os07g0131375;Os07g0541200;Os10g0142600;Os07g0540500;Os02g0738200;Os09g0551400;Os11g0608300;Os07g0597200;Os03g0772600;Os10g0327000;Os01g0816600;Os01g0115600;Os04g0356600;Os12g0130200;Os02g0640500;Os06g0125800;Os09g0353200;Os07g0686800;Os04g0370900;Os08g0457400;Os05g0522600;Os01g0137950;Os02g0231700;Os06g0586150;Os05g0560…	;;;OsRLCK345;;OsRLCK282;;;OsWAK101;OsRLCK236;OsPUB40;;OsRLCK337;;;;;OsRLCK11;;;SIT1;OsBBI1;;OsRLCK241;;OsRLCK255;;OsRLCK23;;;;;OsRLK5;OsMPK13;;OsWAK123;OsRLCK336;;RLCK103;;;;HDAC2;OsRLCK346;;;OsRLCK369;OsWAK81;;;CIPK23;;OsNPK1-PK;;;OsWAK2;;;OsWAK95;OsRLCK353;;;OsPP2C32;OsUPS;;OsRLCK348;;;OsPUB67;;OsWAK87;OsRLCK251;OsRLCK110;OsGSTL1
4	GO:0080163	BP	regulation of protein serine/threonine phosphatase activity	4/ 585	24/ 32702	0.166667	0.000810318	0.0504898	Os12g0555500;Os12g0555300;Os12g0555200;Os12g0555000	OsPR10a;PR10;RPR10b;RSOsPR10
311	GO:0003824	MF	catalytic activity	311/ 585	15142/ 32702	0.0205389	0.000811368	0.0504898	Os08g0507100;Os01g0742400;Os08g0137800;Os06g0210900;Os10g0512400;Os11g0666200;Os12g0257600;Os02g0569400;Os09g0572700;Os07g0693600;Os02g0306401;Os04g0127200;Os07g0538000;Os06g0313440;Os12g0491800;Os01g0201100;Os01g0137875;Os01g0115600;Os08g0542000;Os02g0571900;Os07g0162600;Os01g0115566;Os04g0581000;Os07g0416600;Os04g0104900;Os03g0405500;Os04g0514600;Os01g0137950;Os01g0296450;Os04g0664900;Os01g0687…	CYP76M10;;OsUCL24;;CYP84A5;OsRLCK345;OsLAC28;CYP76M8;OsUCL33;OsTBL14;OsNAAT1;OsSub37;;;OsKSL10;;;OsRLCK11;;CYP76M6;;OsRLCK10;;;OsCOMTL2;;;OsRLCK23;;OsCIN5;;IGPS;TDC1;OsMPK13;OsSub35;;OsUGT706F1;;;OsCYP71E5;OsAGO18;;;;;;OsABCA4;;OsCYP72A19;;OsMMP1;;OsCYP76M7;;OsProDH;;Cht8;OsPR4c;;;;OsLAC7;OsOPR4;;OsRLCK353;;OsPR4b;;;SnRK2;OsLOX8;prx22;OsGSTU17;CYP71Z2;OsUCL4;OsRLCK251;OsRLCK110;OsGSTF5;AOS2;;;OsS…
12	GO:0080134	BP	regulation of response to stress	12/ 585	227/ 32702	0.0528634	0.000865329	0.0528776	Os02g0640500;Os01g0194300;Os02g0181300;Os03g0180900;Os02g0526400;Os05g0542500;Os06g0649000;Os10g0392400;Os03g0815100;Os05g0322900;Os09g0417800;Os03g0334250	SIT1;NH1;WRKY71;OsJAZ2;ClpD1;OsLEA3-1;WRKY28;OsTIFY11d;SNAC1;WRKY45;WRKY62;
2	GO:0036209	MF	9beta-pimara-7,15-diene oxidase activity	2/ 585	3/ 32702	0.666667	0.000947026	0.0556575	Os04g0180400;Os04g0178400	CYP99A2;
2	GO:0016166	MF	phytoene dehydrogenase activity	2/ 585	3/ 32702	0.666667	0.000947026	0.0556575	Os08g0508800;Os08g0509100	Lox2:Os:1;OsLOX8
2	GO:0036469	MF	L-tryptophan decarboxylase activity	2/ 585	3/ 32702	0.666667	0.000947026	0.0556575	Os08g0140500;Os08g0140300	OsTDC3;TDC1
2	GO:0004058	MF	aromatic-L-amino-acid decarboxylase activity	2/ 585	3/ 32702	0.666667	0.000947026	0.0556575	Os08g0140500;Os08g0140300	OsTDC3;TDC1
5	GO:0010466	BP	negative regulation of peptidase activity	5/ 585	44/ 32702	0.113636	0.00109955	0.0605113	Os01g0615050;Os01g0124100;Os01g0615100;Os12g0437800;Os05g0494200	;RBBI3-2;OCPI2;Sci1;Oc2*
5	GO:0052547	BP	regulation of peptidase activity	5/ 585	44/ 32702	0.113636	0.00109955	0.0605113	Os01g0615050;Os01g0124100;Os01g0615100;Os12g0437800;Os05g0494200	;RBBI3-2;OCPI2;Sci1;Oc2*
4	GO:1901072	BP	glucosamine-containing compound catabolic process	4/ 585	26/ 32702	0.153846	0.00110827	0.0605113	Os10g0542900;Os04g0493600;Os03g0132900;Os06g0726200	Cht8;;Cht11;Cht1*(Chi1)
4	GO:0006030	BP	chitin metabolic process	4/ 585	26/ 32702	0.153846	0.00110827	0.0605113	Os10g0542900;Os04g0493600;Os03g0132900;Os06g0726200	Cht8;;Cht11;Cht1*(Chi1)
4	GO:0046348	BP	amino sugar catabolic process	4/ 585	26/ 32702	0.153846	0.00110827	0.0605113	Os10g0542900;Os04g0493600;Os03g0132900;Os06g0726200	Cht8;;Cht11;Cht1*(Chi1)
4	GO:0006032	BP	chitin catabolic process	4/ 585	26/ 32702	0.153846	0.00110827	0.0605113	Os10g0542900;Os04g0493600;Os03g0132900;Os06g0726200	Cht8;;Cht11;Cht1*(Chi1)
4	GO:0006026	BP	aminoglycan catabolic process	4/ 585	26/ 32702	0.153846	0.00110827	0.0605113	Os10g0542900;Os04g0493600;Os03g0132900;Os06g0726200	Cht8;;Cht11;Cht1*(Chi1)
4	GO:0010427	MF	abscisic acid binding	4/ 585	26/ 32702	0.153846	0.00110827	0.0605113	Os12g0555500;Os12g0555300;Os12g0555200;Os12g0555000	OsPR10a;PR10;RPR10b;RSOsPR10
5	GO:0045861	BP	negative regulation of proteolysis	5/ 585	46/ 32702	0.108696	0.0013478	0.0726524	Os01g0615050;Os01g0124100;Os01g0615100;Os12g0437800;Os05g0494200	;RBBI3-2;OCPI2;Sci1;Oc2*
42	GO:0003700	MF	DNA-binding transcription factor activity	42/ 585	1417/ 32702	0.0296401	0.00140395	0.0752	Os11g0668650;Os12g0556200;Os11g0664800;Os05g0474800;Os11g0106100;Os10g0562900;Os09g0456800;Os01g0730700;Os01g0289600;Os05g0322900;Os12g0105600;Os03g0764100;Os12g0564100;Os01g0821600;Os02g0252400;Os09g0522000;Os01g0826400;Os12g0622900;Os01g0159800;Os11g0490900;Os02g0181300;Os06g0649000;Os07g0680400;Os03g0437200;Os01g0584900;Os01g0134700;Os05g0583000;Os02g0770500;Os12g0556500;Os03g0335200;Os09g0417…	;;;OsWRKY70;;DERF12;HSFB1;OsWRKY14;OsWRKY9;WRKY45;;WZF1;R2R3-MYB;OsWRKY21;RPBF;OsDREB1B;OsWRKY24;;OsbHLH035;OsWRKY72;WRKY71;WRKY28;WRKY47;ZFP36;OsWRKY77;;OsWRKY8;OsWRKY32;;OsWRKY79;WRKY76;SPL7;ERF91;OsWRKY67;ERF77;WRKY53;OsDREB1A;;OsWRKY1;OsERF101;WRKY62;OsWRKY69
7	GO:0010243	BP	response to organonitrogen compound	7/ 585	93/ 32702	0.0752688	0.0014224	0.0757094	Os09g0417600;Os01g0194300;Os11g0137300;Os02g0181300;Os06g0649000;Os12g0148400;Os09g0417800	WRKY76;NH1;;WRKY71;WRKY28;;WRKY62
4	GO:0019840	MF	isoprenoid binding	4/ 585	28/ 32702	0.142857	0.00147557	0.0775636	Os12g0555500;Os12g0555300;Os12g0555200;Os12g0555000	OsPR10a;PR10;RPR10b;RSOsPR10
5	GO:0010565	BP	regulation of cellular ketone metabolic process	5/ 585	48/ 32702	0.104167	0.0016351	0.0845528	Os11g0668650;Os12g0556200;Os12g0556500;Os11g0664800;Os01g0134700	;;;;
8	GO:1901698	BP	response to nitrogen compound	8/ 585	123/ 32702	0.0650407	0.0017061	0.0859448	Os09g0417600;Os01g0194300;Os11g0137300;Os02g0181300;Os06g0649000;Os12g0148400;Os09g0417800;Os02g0650900	WRKY76;NH1;;WRKY71;WRKY28;;WRKY62;OsGDH3
33	GO:0043565	MF	sequence-specific DNA binding	33/ 585	1037/ 32702	0.0318226	0.00172225	0.0862449	Os11g0668650;Os12g0556200;Os11g0664800;Os05g0474800;Os11g0127600;Os09g0456800;Os01g0730700;Os01g0289600;Os05g0322900;Os03g0764100;Os05g0343400;Os01g0821600;Os01g0826400;Os08g0386200;Os12g0564100;Os02g0181300;Os06g0649000;Os07g0680400;Os11g0490900;Os03g0437200;Os01g0584900;Os01g0134700;Os05g0583000;Os02g0770500;Os12g0556500;Os03g0335200;Os09g0417600;Os05g0530400;Os05g0183100;Os12g0123800;Os01g0246…	;;;OsWRKY70;ONAC045;HSFB1;OsWRKY14;OsWRKY9;WRKY45;WZF1;WRKY53;OsWRKY21;OsWRKY24;OsWRKY69;R2R3-MYB;WRKY71;WRKY28;WRKY47;OsWRKY72;ZFP36;OsWRKY77;;OsWRKY8;OsWRKY32;;OsWRKY79;WRKY76;SPL7;OsWRKY67;ONAC077;OsWRKY1;WRKY62;SNAC1
12	GO:0004857	MF	enzyme inhibitor activity	12/ 585	248/ 32702	0.0483871	0.0018361	0.0914053	Os12g0555300;Os03g0734300;Os01g0615050;Os05g0494200;Os12g0555000;Os01g0267300;Os12g0555500;Os06g0193200;Os12g0437800;Os01g0124100;Os01g0615100;Os12g0555200	PR10;;;Oc2*;RSOsPR10;OsSRP-QKG;OsPR10a;OsPME19;Sci1;RBBI3-2;OCPI2;RPR10b
2	GO:0006587	BP	serotonin biosynthetic process from tryptophan	2/ 585	4/ 32702	0.5	0.00187157	0.0915556	Os08g0140500;Os08g0140300	OsTDC3;TDC1
2	GO:1900425	BP	negative regulation of defense response to bacterium	2/ 585	4/ 32702	0.5	0.00187157	0.0915556	Os05g0322900;Os09g0417800	WRKY45;WRKY62
2	GO:0042427	BP	serotonin biosynthetic process	2/ 585	4/ 32702	0.5	0.00187157	0.0915556	Os08g0140500;Os08g0140300	OsTDC3;TDC1
12	GO:0140678	MF	molecular function inhibitor activity	12/ 585	251/ 32702	0.0478088	0.00202882	0.0986774	Os12g0555300;Os03g0734300;Os01g0615050;Os05g0494200;Os12g0555000;Os01g0267300;Os12g0555500;Os06g0193200;Os12g0437800;Os01g0124100;Os01g0615100;Os12g0555200	PR10;;;Oc2*;RSOsPR10;OsSRP-QKG;OsPR10a;OsPME19;Sci1;RBBI3-2;OCPI2;RPR10b
4	GO:1901071	BP	glucosamine-containing compound metabolic process	4/ 585	31/ 32702	0.129032	0.00217366	0.103346	Os10g0542900;Os04g0493600;Os03g0132900;Os06g0726200	Cht8;;Cht11;Cht1*(Chi1)
4	GO:2000070	BP	regulation of response to water deprivation	4/ 585	31/ 32702	0.129032	0.00217366	0.103346	Os02g0526400;Os05g0322900;Os05g0542500;Os03g0815100	ClpD1;WRKY45;OsLEA3-1;SNAC1
8	GO:0006749	BP	glutathione metabolic process	8/ 585	129/ 32702	0.0620155	0.00230185	0.108225	Os10g0527800;Os01g0369700;Os01g0370900;Os10g0531400;Os01g0558100;Os09g0467200;Os01g0949700;Os10g0529500	OsGSTU12;OsGSTF5;OsGSTF8;OsGSTU10;OsGSTU6;OsGSTU17;OsGSTU7;OsGSTU30
6	GO:0009808	BP	lignin metabolic process	6/ 585	76/ 32702	0.0789474	0.00242298	0.112984	Os10g0512400;Os11g0641500;Os12g0257600;Os12g0258700;Os10g0346300;Os01g0850550	CYP84A5;OsLAC23;OsLAC28;OsLAC29;OsLAC17;OsLAC7
4	GO:0004864	MF	protein phosphatase inhibitor activity	4/ 585	32/ 32702	0.125	0.00244944	0.113277	Os12g0555500;Os12g0555300;Os12g0555200;Os12g0555000	OsPR10a;PR10;RPR10b;RSOsPR10
5	GO:0051346	BP	negative regulation of hydrolase activity	5/ 585	53/ 32702	0.0943396	0.00254738	0.117166	Os01g0615050;Os01g0124100;Os01g0615100;Os12g0437800;Os05g0494200	;RBBI3-2;OCPI2;Sci1;Oc2*
3	GO:0045332	BP	phospholipid translocation	3/ 585	16/ 32702	0.1875	0.00268087	0.121979	Os03g0326100;Os03g0326200;Os05g0100600	;;
4	GO:0035672	BP	oligopeptide transmembrane transport	4/ 585	33/ 32702	0.121212	0.00274834	0.122296	Os04g0524600;Os04g0524500;Os10g0470700;Os02g0649900	OsYSL12;OsYSL13;OsPTR3;YSL2
4	GO:0015914	BP	phospholipid transport	4/ 585	33/ 32702	0.121212	0.00274834	0.122296	Os03g0326100;Os03g0326000;Os03g0326200;Os05g0100600	;;;
6	GO:0016998	BP	cell wall macromolecule catabolic process	6/ 585	78/ 32702	0.0769231	0.00276293	0.122296	Os10g0542900;Os04g0493600;Os01g0296450;Os02g0752250;Os03g0132900;Os06g0726200	Cht8;;;;Cht11;Cht1*(Chi1)
9	GO:0050832	BP	defense response to fungus	9/ 585	163/ 32702	0.0552147	0.00277452	0.122296	Os11g0226933;Os10g0542900;Os01g0194300;Os11g0592000;Os11g0592100;Os02g0181300;Os11g0211400;Os03g0132900;Os06g0726200	;Cht8;NH1;OsPR4c;OsPR4b;WRKY71;;Cht11;Cht1*(Chi1)
4	GO:0019212	MF	phosphatase inhibitor activity	4/ 585	33/ 32702	0.121212	0.00274834	0.122296	Os12g0555500;Os12g0555300;Os12g0555200;Os12g0555000	OsPR10a;PR10;RPR10b;RSOsPR10
9	GO:0042742	BP	defense response to bacterium	9/ 585	165/ 32702	0.0545455	0.00300987	0.131982	Os07g0130800;Os11g0592000;Os02g0640500;Os01g0194300;Os11g0592100;Os07g0522500;Os07g0131375;Os03g0772600;Os04g0288500	;OsPR4c;SIT1;NH1;OsPR4b;ABCG43;;;
4	GO:0043666	BP	regulation of phosphoprotein phosphatase activity	4/ 585	34/ 32702	0.117647	0.00307128	0.13309	Os12g0555500;Os12g0555300;Os12g0555200;Os12g0555000	OsPR10a;PR10;RPR10b;RSOsPR10
2	GO:0071395	BP	cellular response to jasmonic acid stimulus	2/ 585	5/ 32702	0.4	0.00308232	0.13309	Os04g0180400;Os04g0178400	CYP99A2;
2	GO:0042428	BP	serotonin metabolic process	2/ 585	5/ 32702	0.4	0.00308232	0.13309	Os08g0140500;Os08g0140300	OsTDC3;TDC1
4	GO:0042562	MF	hormone binding	4/ 585	35/ 32702	0.114286	0.00341918	0.146886	Os12g0555500;Os12g0555300;Os12g0555200;Os12g0555000	OsPR10a;PR10;RPR10b;RSOsPR10
7	GO:0009414	BP	response to water deprivation	7/ 585	110/ 32702	0.0636364	0.00368934	0.156899	Os03g0437200;Os11g0127600;Os07g0150700;Os02g0181300;Os03g0218400;Os11g0454300;Os11g0451700	ZFP36;ONAC045;CIPK23;WRKY71;OsMST4;Rab16A;OsLEA25
3	GO:0034204	BP	lipid translocation	3/ 585	18/ 32702	0.166667	0.00380405	0.160168	Os03g0326100;Os03g0326200;Os05g0100600	;;
8	GO:0031347	BP	regulation of defense response	8/ 585	141/ 32702	0.0567376	0.00397413	0.16568	Os01g0194300;Os03g0180900;Os02g0181300;Os06g0649000;Os10g0392400;Os05g0322900;Os09g0417800;Os03g0334250	NH1;OsJAZ2;WRKY71;WRKY28;OsTIFY11d;WRKY45;WRKY62;
4	GO:0010921	BP	regulation of phosphatase activity	4/ 585	37/ 32702	0.108108	0.00419339	0.173964	Os12g0555500;Os12g0555300;Os12g0555200;Os12g0555000	OsPR10a;PR10;RPR10b;RSOsPR10
3	GO:0046219	BP	indolalkylamine biosynthetic process	3/ 585	19/ 32702	0.157895	0.00445782	0.183139	Os08g0320400;Os07g0182100;Os09g0255400	;OsTSA;IGPS
3	GO:0000162	BP	tryptophan biosynthetic process	3/ 585	19/ 32702	0.157895	0.00445782	0.183139	Os08g0320400;Os07g0182100;Os09g0255400	;OsTSA;IGPS
2	GO:1901162	BP	primary amino compound biosynthetic process	2/ 585	6/ 32702	0.333333	0.00456877	0.183249	Os08g0140500;Os08g0140300	OsTDC3;TDC1
2	GO:0071398	BP	cellular response to fatty acid	2/ 585	6/ 32702	0.333333	0.00456877	0.183249	Os04g0180400;Os04g0178400	CYP99A2;
2	GO:0004640	MF	phosphoribosylanthranilate isomerase activity	2/ 585	6/ 32702	0.333333	0.00456877	0.183249	Os08g0320400;Os09g0255400	;IGPS
2	GO:0004425	MF	indole-3-glycerol-phosphate synthase activity	2/ 585	6/ 32702	0.333333	0.00456877	0.183249	Os08g0320400;Os09g0255400	;IGPS
7	GO:0005507	MF	copper ion binding	7/ 585	115/ 32702	0.0608696	0.00470894	0.18798	Os11g0641500;Os12g0257600;Os03g0288000;Os10g0346300;Os01g0850550;Os09g0365900;Os12g0258700	OsLAC23;OsLAC28;OsMT1b;OsLAC17;OsLAC7;OsORAP1;OsLAC29
3	GO:0031348	BP	negative regulation of defense response	3/ 585	20/ 32702	0.15	0.00517549	0.203722	Os05g0322900;Os01g0194300;Os09g0417800	WRKY45;NH1;WRKY62
31	GO:0042221	BP	response to chemical	31/ 585	1019/ 32702	0.030422	0.00524027	0.205317	Os01g0194300;Os10g0527800;Os04g0178400;Os11g0127600;Os07g0150700;Os03g0660500;Os01g0826400;Os01g0369700;Os02g0181300;Os06g0649000;Os01g0949700;Os11g0451700;Os02g0649900;Os02g0650900;Os03g0437200;Os07g0522500;Os01g0591300;Os04g0615200;Os04g0180400;Os11g0137300;Os09g0545300;Os03g0218400;Os09g0417600;Os01g0370900;Os11g0454300;Os10g0531400;Os01g0558100;Os09g0467200;Os12g0148400;Os09g0417800;Os10g0529…	NH1;OsGSTU12;;ONAC045;CIPK23;OsSAUR17;OsWRKY24;OsGSTF5;WRKY71;WRKY28;OsGSTU7;OsLEA25;YSL2;OsGDH3;ZFP36;ABCG43;OsALDH2C1;;CYP99A2;;SAUR39;OsMST4;WRKY76;OsGSTF8;Rab16A;OsGSTU10;OsGSTU6;OsGSTU17;;WRKY62;OsGSTU30
5	GO:0062012	BP	regulation of small molecule metabolic process	5/ 585	63/ 32702	0.0793651	0.00539469	0.20925	Os12g0556200;Os11g0668650;Os12g0556500;Os11g0664800;Os01g0134700	;;;;
7	GO:0009415	BP	response to water	7/ 585	118/ 32702	0.059322	0.00541484	0.20925	Os03g0437200;Os11g0127600;Os07g0150700;Os02g0181300;Os03g0218400;Os11g0454300;Os11g0451700	ZFP36;ONAC045;CIPK23;WRKY71;OsMST4;Rab16A;OsLEA25
5	GO:0005319	MF	lipid transporter activity	5/ 585	63/ 32702	0.0793651	0.00539469	0.20925	Os03g0326100;Os03g0326000;Os03g0326200;Os08g0398300;Os05g0100600	;;;OsABCA4;
84	GO:0006793	BP	phosphorus metabolic process	84/ 585	3516/ 32702	0.0238908	0.00572137	0.219976	Os07g0130800;Os01g0742400;Os11g0514500;Os04g0509000;Os11g0666200;Os01g0670100;Os09g0570100;Os07g0131375;Os04g0633300;Os07g0541200;Os10g0142600;Os07g0540500;Os05g0194900;Os07g0150700;Os09g0551400;Os11g0608300;Os07g0597200;Os03g0772600;Os10g0327000;Os01g0137875;Os01g0115600;Os04g0356600;Os12g0130200;Os01g0870750;Os01g0115566;Os01g0816600;Os04g0430600;Os09g0353200;Os07g0686800;Os12g0182333;Os08g0457…	;;;;OsRLCK345;;OsRLCK282;;;;OsWAK101;OsRLCK236;OsPPi-PFK;CIPK23;;OsRLCK337;;;;;OsRLCK11;;;;OsRLCK10;;;;OsRLCK241;;OsRLCK255;;OsRLCK23;;OsDXS;;;;OsRLK5;OsMPK13;;OsWAK123;;WAK14;RLCK103;OsWAK95;;;;;;OsRLCK346;SIT1;;OsRLCK369;OsWAK81;;;;;;;OsNPK1-PK;;;OsWAK2;OsRLCK251;;LYP2;;OsRLCK353;;;OsPP2C32;;;OsRLCK348;;;;OsWAK87;OsBDG1;OsRLCK110;OsRLCK336
3	GO:0030261	BP	chromosome condensation	3/ 585	21/ 32702	0.142857	0.00595871	0.225869	Os04g0142400;Os03g0799050;Os04g0149400	;;
3	GO:0097035	BP	regulation of membrane lipid distribution	3/ 585	21/ 32702	0.142857	0.00595871	0.225869	Os03g0326100;Os03g0326200;Os05g0100600	;;
8	GO:1902074	BP	response to salt	8/ 585	151/ 32702	0.0529801	0.00597832	0.225869	Os03g0437200;Os01g0194300;Os11g0127600;Os07g0150700;Os02g0181300;Os03g0218400;Os11g0454300;Os11g0451700	ZFP36;NH1;ONAC045;CIPK23;WRKY71;OsMST4;Rab16A;OsLEA25
4	GO:0035304	BP	regulation of protein dephosphorylation	4/ 585	41/ 32702	0.097561	0.0060794	0.227655	Os12g0555500;Os12g0555300;Os12g0555200;Os12g0555000	OsPR10a;PR10;RPR10b;RSOsPR10
4	GO:0043178	MF	alcohol binding	4/ 585	41/ 32702	0.097561	0.0060794	0.227655	Os12g0555500;Os12g0555300;Os12g0555200;Os12g0555000	OsPR10a;PR10;RPR10b;RSOsPR10
2	GO:0010241	BP	ent-kaurene oxidation to kaurenoic acid	2/ 585	7/ 32702	0.285714	0.00632071	0.23057	Os06g0568600;Os06g0569500	OsKO5;KO4
2	GO:1901160	BP	primary amino compound metabolic process	2/ 585	7/ 32702	0.285714	0.00632071	0.23057	Os08g0140500;Os08g0140300	OsTDC3;TDC1
2	GO:0046621	BP	negative regulation of organ growth	2/ 585	7/ 32702	0.285714	0.00632071	0.23057	Os06g0125800;Os09g0545300	OsBBI1;SAUR39
2	GO:0033331	BP	ent-kaurene metabolic process	2/ 585	7/ 32702	0.285714	0.00632071	0.23057	Os06g0568600;Os06g0569500	OsKO5;KO4
2	GO:0000796	CC	condensin complex	2/ 585	7/ 32702	0.285714	0.00632071	0.23057	Os04g0142400;Os04g0149400	;
2	GO:0052615	MF	ent-kaurene oxidase activity	2/ 585	7/ 32702	0.285714	0.00632071	0.23057	Os06g0568600;Os06g0569500	OsKO5;KO4
11	GO:0048046	CC	apoplast	11/ 585	254/ 32702	0.0433071	0.00638953	0.23208	Os08g0460000;Os10g0346300;Os03g0693700;Os12g0257600;Os12g0258700;Os09g0472700;Os08g0485800;Os01g0850550;Os04g0664900;Os04g0288100;Os11g0641500	OsGLP1;OsLAC17;OsOxO1;OsLAC28;OsLAC29;;;OsLAC7;OsCIN5;;OsLAC23
7	GO:0001101	BP	response to acid chemical	7/ 585	122/ 32702	0.057377	0.00647582	0.234209	Os03g0437200;Os11g0127600;Os07g0150700;Os02g0181300;Os03g0218400;Os11g0454300;Os11g0451700	ZFP36;ONAC045;CIPK23;WRKY71;OsMST4;Rab16A;OsLEA25
83	GO:0006796	BP	phosphate-containing compound metabolic process	83/ 585	3463/ 32702	0.0239677	0.00653149	0.235217	Os07g0130800;Os01g0742400;Os11g0514500;Os04g0509000;Os11g0666200;Os01g0670100;Os09g0570100;Os07g0131375;Os04g0633300;Os07g0541200;Os10g0142600;Os07g0540500;Os05g0194900;Os07g0150700;Os09g0551400;Os11g0608300;Os07g0597200;Os03g0772600;Os10g0327000;Os01g0137875;Os01g0115600;Os04g0356600;Os12g0130200;Os01g0870750;Os01g0115566;Os01g0816600;Os04g0430600;Os09g0353200;Os07g0686800;Os12g0182333;Os08g0457…	;;;;OsRLCK345;;OsRLCK282;;;;OsWAK101;OsRLCK236;OsPPi-PFK;CIPK23;;OsRLCK337;;;;;OsRLCK11;;;;OsRLCK10;;;;OsRLCK241;;OsRLCK255;;OsRLCK23;;OsDXS;;;;OsRLK5;OsMPK13;;OsWAK123;OsRLCK336;WAK14;RLCK103;OsWAK95;;;;;;OsRLCK346;SIT1;;OsRLCK369;OsWAK81;;;;;;;OsNPK1-PK;;;OsWAK2;OsRLCK251;;LYP2;;OsRLCK353;;;OsPP2C32;;;OsRLCK348;;;;OsWAK87;OsBDG1;OsRLCK110
4	GO:0009685	BP	gibberellin metabolic process	4/ 585	42/ 32702	0.0952381	0.00662599	0.237609	Os04g0178300;Os06g0568600;Os06g0569500;Os02g0181300	OsCPS4;OsKO5;KO4;WRKY71
275	GO:0016020	CC	membrane	275/ 585	13549/ 32702	0.0202967	0.00667512	0.238361	Os08g0507100;Os03g0638400;Os08g0137800;Os06g0210900;Os10g0512400;Os07g0654500;Os04g0401700;Os09g0313600;Os09g0572700;Os07g0654450;Os07g0693600;Os09g0129600;Os01g0597600;Os07g0597200;Os07g0538000;Os03g0570100;Os01g0137875;Os01g0115600;Os02g0571900;Os02g0231700;Os01g0115566;Os10g0469600;Os08g0404500;Os02g0216200;Os03g0682100;Os09g0532000;Os02g0205500;Os01g0831300;Os04g0600300;Os08g0538100;Os04g0121…	CYP76M10;;OsUCL24;;CYP84A5;;HAK1;;OsUCL33;;OsTBL14;;OsATL15;;;;;OsRLCK11;CYP76M6;;OsRLCK10;;;;OsMFS1;SGR;;OsAMT2;AOX1B;;OsSub35;;;YSL2;;OsZIP8;Asr4;OsCYP71E5;;;;;;;OsABCG44;;OsCHX15;OsFLA7;;CYP76M5;;;;OsCYP76M7;;PT8;;;;OsRLCK353;;;;;;OsNPR4;;OsUCL4;;OsKO5;Oscyp71Z8;;;;;;;CYP72A1;;;;;CYP76M14;OsCAT1;;;;OsMST4;;;OsPR2;;;OsCYP72A32;;;;;;;;WAK14;;;KO4;;;;;OsYSL13;;;Rpp17;;;CYP71Z2;OsPTR5;OsGLR1.3;;;;…
3	GO:0006536	BP	glutamate metabolic process	3/ 585	22/ 32702	0.136364	0.00680895	0.241105	Os10g0550900;Os03g0236200;Os02g0650900	OsProDH;OsGAD3;OsGDH3
8	GO:0009409	BP	response to cold	8/ 585	155/ 32702	0.0516129	0.00696564	0.244607	Os12g0406000;Os12g0533550;Os11g0454300;Os04g0517100;Os02g0181300;Os05g0322900;Os11g0451700;Os02g0650900	;;Rab16A;OsMyb4;WRKY71;WRKY45;OsLEA25;OsGDH3
3	GO:0071495	BP	cellular response to endogenous stimulus	3/ 585	23/ 32702	0.130435	0.00772756	0.262644	Os04g0180400;Os01g0194300;Os04g0178400	CYP99A2;NH1;
3	GO:0009751	BP	response to salicylic acid	3/ 585	23/ 32702	0.130435	0.00772756	0.262644	Os09g0417600;Os09g0417800;Os02g0181300	WRKY76;WRKY62;WRKY71
4	GO:0009074	BP	aromatic amino acid family catabolic process	4/ 585	44/ 32702	0.0909091	0.0078146	0.264123	Os05g0427400;Os01g0160100;Os02g0306401;Os02g0626532	OsPAL04;;OsNAAT1;
70	GO:0051171	BP	regulation of nitrogen compound metabolic process	70/ 585	2873/ 32702	0.0243648	0.00789477	0.265133	Os11g0668650;Os12g0556200;Os01g0194300;Os12g0437800;Os11g0664800;Os01g0575200;Os05g0474800;Os11g0106100;Os11g0127600;Os04g0354200;Os10g0562900;Os12g0123800;Os01g0730700;Os01g0289600;Os05g0322900;Os08g0386200;Os12g0105600;Os01g0615100;Os12g0564100;Os01g0821600;Os02g0252400;Os09g0522000;Os01g0160800;Os01g0826400;Os12g0555300;Os03g0105500;Os02g0789700;Os05g0494200;Os01g0615050;Os01g0159800;Os11g0490…	;;NH1;Sci1;;OsbHLH024;OsWRKY70;;ONAC045;;DERF12;ONAC077;OsWRKY14;OsWRKY9;WRKY45;OsWRKY69;;OCPI2;R2R3-MYB;OsWRKY21;RPBF;OsDREB1B;;OsWRKY24;PR10;;;Oc2*;;OsbHLH035;OsWRKY72;NAC58;NAC95;OsNAC3;;RPR10b;WRKY47;OsWRKY1;ZFP36;OsWRKY77;;HDAC2;OsWRKY8;OsWRKY32;WZF1;;WRKY28;OsWRKY79;RBBI3-2;RSOsPR10;;WRKY71;WRKY76;SPL7;;ERF91;;OsWRKY67;HSFB1;DPF;WRKY53;OsPR10a;OsDREB1A;OsNAC4;OsMyb4;ERF77;OsERF101;;WRKY62;S…
2	GO:0007076	BP	mitotic chromosome condensation	2/ 585	8/ 32702	0.25	0.00832819	0.276373	Os04g0142400;Os04g0149400	;
2	GO:0097164	BP	ammonium ion metabolic process	2/ 585	8/ 32702	0.25	0.00832819	0.276373	Os08g0140500;Os08g0140300	OsTDC3;TDC1
2	GO:0009938	BP	negative regulation of gibberellic acid mediated signaling pathway	2/ 585	8/ 32702	0.25	0.00832819	0.276373	Os02g0181300;Os01g0826400	WRKY71;OsWRKY24
4	GO:0006022	BP	aminoglycan metabolic process	4/ 585	45/ 32702	0.0888889	0.00845807	0.276373	Os10g0542900;Os04g0493600;Os03g0132900;Os06g0726200	Cht8;;Cht11;Cht1*(Chi1)
4	GO:0006040	BP	amino sugar metabolic process	4/ 585	45/ 32702	0.0888889	0.00845807	0.276373	Os10g0542900;Os04g0493600;Os03g0132900;Os06g0726200	Cht8;;Cht11;Cht1*(Chi1)
7	GO:0048585	BP	negative regulation of response to stimulus	7/ 585	129/ 32702	0.0542636	0.00869413	0.28261	Os02g0640500;Os01g0194300;Os01g0826400;Os02g0181300;Os05g0322900;Os06g0594400;Os09g0417800	SIT1;NH1;OsWRKY24;WRKY71;WRKY45;OsKMD2;WRKY62
3	GO:0009065	BP	glutamine family amino acid catabolic process	3/ 585	24/ 32702	0.125	0.00871573	0.28261	Os10g0550900;Os03g0236200;Os02g0650900	OsProDH;OsGAD3;OsGDH3
27	GO:0016887	MF	ATP hydrolysis activity	27/ 585	892/ 32702	0.0302691	0.00957252	0.309207	Os02g0526400;Os12g0481400;Os01g0342750;Os03g0326200;Os01g0609300;Os01g0297200;Os11g0155600;Os07g0192000;Os08g0384500;Os06g0697600;Os05g0100600;Os03g0326000;Os07g0522500;Os12g0431100;Os03g0326100;Os08g0398300;Os03g0802500;Os03g0821150;Os09g0472100;Os04g0209300;Os05g0509500;Os04g0209200;Os12g0471100;Os11g0587600;Os01g0695800;Os01g0609900;Os04g0514600	ClpD1;;;;OsPDR9;;OsABCC16;;OsABCG44;;;;ABCG43;;;OsABCA4;;;OsABCG22;OsABCC10;;OsABCC9;;OsABCG48;MDR4;OsPDR8;
3	GO:1902584	BP	positive regulation of response to water deprivation	3/ 585	25/ 32702	0.12	0.00977454	0.309412	Os02g0526400;Os05g0542500;Os03g0815100	ClpD1;OsLEA3-1;SNAC1
3	GO:0007178	BP	transmembrane receptor protein serine/threonine kinase signaling pathway	3/ 585	25/ 32702	0.12	0.00977454	0.309412	Os07g0130800;Os07g0131375;Os02g0640500	;;SIT1
3	GO:0009686	BP	gibberellin biosynthetic process	3/ 585	25/ 32702	0.12	0.00977454	0.309412	Os04g0178300;Os06g0568600;Os06g0569500	OsCPS4;OsKO5;KO4
3	GO:0007167	BP	enzyme-linked receptor protein signaling pathway	3/ 585	25/ 32702	0.12	0.00977454	0.309412	Os07g0130800;Os07g0131375;Os02g0640500	;;SIT1
7	GO:0043177	MF	organic acid binding	7/ 585	132/ 32702	0.0530303	0.00979823	0.309412	Os12g0555300;Os10g0536400;Os12g0555000;Os12g0555500;Os09g0451400;Os10g0558750;Os12g0555200	PR10;OsF3H-2;RSOsPR10;OsPR10a;ACO2;;RPR10b
7	GO:0031406	MF	carboxylic acid binding	7/ 585	132/ 32702	0.0530303	0.00979823	0.309412	Os12g0555300;Os10g0536400;Os12g0555000;Os12g0555500;Os09g0451400;Os10g0558750;Os12g0555200	PR10;OsF3H-2;RSOsPR10;OsPR10a;ACO2;;RPR10b
9	GO:0008037	BP	cell recognition	9/ 585	200/ 32702	0.045	0.0102831	0.321129	Os12g0130200;Os01g0870750;Os01g0670100;Os01g0587400;Os09g0551400;Os01g0670300;Os04g0633300;Os07g0550900;Os04g0356600	;;;;;;;;
9	GO:0048544	BP	recognition of pollen	9/ 585	200/ 32702	0.045	0.0102831	0.321129	Os12g0130200;Os01g0870750;Os01g0670100;Os01g0587400;Os09g0551400;Os01g0670300;Os04g0633300;Os07g0550900;Os04g0356600	;;;;;;;;
6	GO:0009738	BP	abscisic acid-activated signaling pathway	6/ 585	103/ 32702	0.0582524	0.0106086	0.328865	Os12g0555300;Os01g0826400;Os12g0555000;Os12g0555500;Os03g0327800;Os12g0555200	PR10;OsWRKY24;RSOsPR10;OsPR10a;NAC58;RPR10b
4	GO:0033293	MF	monocarboxylic acid binding	4/ 585	48/ 32702	0.0833333	0.0105933	0.328865	Os12g0555500;Os12g0555300;Os12g0555200;Os12g0555000	OsPR10a;PR10;RPR10b;RSOsPR10
3	GO:2000022	BP	regulation of jasmonic acid mediated signaling pathway	3/ 585	26/ 32702	0.115385	0.0109049	0.336815	Os10g0392400;Os01g0194300;Os03g0180900	OsTIFY11d;NH1;OsJAZ2
42	GO:0140110	MF	transcription regulator activity	42/ 585	1580/ 32702	0.0265823	0.0110461	0.337483	Os11g0668650;Os12g0556200;Os11g0664800;Os05g0474800;Os11g0106100;Os10g0562900;Os09g0456800;Os01g0730700;Os01g0289600;Os05g0322900;Os12g0105600;Os03g0764100;Os12g0564100;Os01g0821600;Os02g0252400;Os09g0522000;Os01g0826400;Os12g0622900;Os01g0159800;Os11g0490900;Os02g0181300;Os06g0649000;Os07g0680400;Os03g0437200;Os01g0584900;Os01g0134700;Os05g0583000;Os02g0770500;Os12g0556500;Os03g0335200;Os09g0417…	;;;OsWRKY70;;DERF12;HSFB1;OsWRKY14;OsWRKY9;WRKY45;;WZF1;R2R3-MYB;OsWRKY21;RPBF;OsDREB1B;OsWRKY24;;OsbHLH035;OsWRKY72;WRKY71;WRKY28;WRKY47;ZFP36;OsWRKY77;;OsWRKY8;OsWRKY32;;OsWRKY79;WRKY76;SPL7;ERF91;OsWRKY67;ERF77;WRKY53;OsDREB1A;;OsWRKY1;OsERF101;WRKY62;OsWRKY69
5	GO:0006576	BP	biogenic amine metabolic process	5/ 585	75/ 32702	0.0666667	0.0111356	0.338994	Os07g0182100;Os08g0140500;Os08g0320400;Os09g0255400;Os08g0140300	OsTSA;OsTDC3;;IGPS;TDC1
255	GO:1901363	MF	heterocyclic compound binding	255/ 585	12586/ 32702	0.0202606	0.0113809	0.343836	Os08g0507100;Os01g0742400;Os01g0915900;Os11g0161133;Os11g0666200;Os12g0257600;Os09g0313600;Os11g0598300;Os02g0306401;Os07g0597200;Os01g0730700;Os10g0512400;Os01g0137875;Os01g0115600;Os02g0571900;Os02g0252400;Os01g0115566;Os06g0125800;Os07g0416600;Os04g0223500;Os06g0267900;Os04g0180400;Os01g0721400;Os01g0137950;Os04g0430600;Os08g0140300;Os02g0135200;Os06g0698802;Os01g0356951;Os03g0105500;Os11g0226…	CYP76M10;;;;OsRLCK345;OsLAC28;;;OsNAAT1;;OsWRKY14;CYP84A5;;OsRLCK11;CYP76M6;RPBF;OsRLCK10;OsBBI1;;;;CYP99A2;;OsRLCK23;;TDC1;OsMPK13;;;;;;OsCYP71E5;OsAGO18;;;;;;;OsABCA4;ERF77;OsABCC16;;;CYP76M5;;OsLRR;;OsCYP76M7;;OsProDH;;;;OsOPR4;OsWRKY67;OsRLCK353;;;;;OsNAC4;OsMyb4;prx22;CYP71Z2;OsRLCK110;AOS2;HSFB1;;OsKO5;Oscyp71Z8;;;;OsRLCK282;;;CYP72A1;ONAC045;;ONAC077;CYP76M8;;WRKY45;;;R2R3-MYB;;OsDREB1B;;;…
81	GO:0016772	MF	transferase activity, transferring phosphorus-containing groups	81/ 585	3460/ 32702	0.0234104	0.0119501	0.356104	Os07g0130800;Os01g0742400;Os11g0514500;Os04g0509000;Os11g0666200;Os01g0670100;Os09g0570100;Os07g0131375;Os04g0633300;Os07g0541200;Os10g0142600;Os07g0540500;Os05g0194900;Os07g0150700;Os09g0551400;Os11g0608300;Os07g0597200;Os03g0772600;Os10g0327000;Os01g0137875;Os01g0115600;Os04g0356600;Os12g0130200;Os01g0870750;Os01g0115566;Os01g0816600;Os04g0430600;Os09g0353200;Os05g0261700;Os07g0686800;Os12g0182…	;;;;OsRLCK345;;OsRLCK282;;;;OsWAK101;OsRLCK236;OsPPi-PFK;CIPK23;;OsRLCK337;;;;;OsRLCK11;;;;OsRLCK10;;;;;OsRLCK241;;OsRLCK255;;OsRLCK23;;;;;OsRLK5;OsMPK13;;OsWAK123;OsRLCK336;WAK14;RLCK103;OsWAK95;;;;;;HDAC2;OsRLCK346;SIT1;;OsRLCK369;OsWAK81;;;;;;;OsNPK1-PK;;;OsWAK2;OsRLCK251;LYP2;;OsRLCK353;;;;;OsRLCK348;;;OsWAK87;OsBDG1;OsRLCK110
3	GO:0009627	BP	systemic acquired resistance	3/ 585	27/ 32702	0.111111	0.0121077	0.357029	Os08g0485800;Os01g0194300;Os09g0472700	;NH1;
4	GO:0035303	BP	regulation of dephosphorylation	4/ 585	50/ 32702	0.08	0.0121937	0.358317	Os12g0555500;Os12g0555300;Os12g0555200;Os12g0555000	OsPR10a;PR10;RPR10b;RSOsPR10
5	GO:0042887	MF	amide transmembrane transporter activity	5/ 585	77/ 32702	0.0649351	0.0123853	0.362687	Os04g0524600;Os04g0524500;Os10g0470700;Os02g0649900;Os01g0209800	OsYSL12;OsYSL13;OsPTR3;YSL2;OsCAT1
70	GO:0080090	BP	regulation of primary metabolic process	70/ 585	2918/ 32702	0.023989	0.0125845	0.367122	Os11g0668650;Os12g0556200;Os01g0194300;Os12g0437800;Os11g0664800;Os01g0575200;Os05g0474800;Os11g0106100;Os11g0127600;Os04g0354200;Os10g0562900;Os12g0123800;Os01g0730700;Os01g0289600;Os05g0322900;Os08g0386200;Os12g0105600;Os01g0615100;Os12g0564100;Os01g0821600;Os02g0252400;Os09g0522000;Os01g0160800;Os01g0826400;Os12g0555300;Os03g0105500;Os02g0789700;Os05g0494200;Os01g0615050;Os01g0159800;Os11g0490…	;;NH1;Sci1;;OsbHLH024;OsWRKY70;;ONAC045;;DERF12;ONAC077;OsWRKY14;OsWRKY9;WRKY45;OsWRKY69;;OCPI2;R2R3-MYB;OsWRKY21;RPBF;OsDREB1B;;OsWRKY24;PR10;;;Oc2*;;OsbHLH035;OsWRKY72;NAC58;NAC95;OsNAC3;;RPR10b;WRKY47;OsWRKY1;ZFP36;OsWRKY77;;HDAC2;OsWRKY8;OsWRKY32;WZF1;;WRKY28;OsWRKY79;RBBI3-2;RSOsPR10;;WRKY71;WRKY76;SPL7;;ERF91;;OsWRKY67;HSFB1;DPF;WRKY53;OsPR10a;OsDREB1A;OsNAC4;OsMyb4;ERF77;OsERF101;;WRKY62;S…
12	GO:0042626	MF	ATPase-coupled transmembrane transporter activity	12/ 585	300/ 32702	0.04	0.0126235	0.367122	Os01g0609300;Os04g0209300;Os07g0522500;Os04g0209200;Os01g0342750;Os08g0398300;Os11g0587600;Os11g0155600;Os01g0695800;Os08g0384500;Os01g0609900;Os09g0472100	OsPDR9;OsABCC10;ABCG43;OsABCC9;;OsABCA4;OsABCG48;OsABCC16;MDR4;OsABCG44;OsPDR8;OsABCG22
10	GO:0038023	MF	signaling receptor activity	10/ 585	243/ 32702	0.0411523	0.0126671	0.36713	Os07g0130800;Os02g0640500;Os12g0555300;Os07g0131375;Os12g0555000;Os12g0555500;Os09g0431100;Os03g0772600;Os04g0288500;Os12g0555200	;SIT1;PR10;;RSOsPR10;OsPR10a;OsGLR1.3;;;RPR10b
255	GO:0097159	MF	organic cyclic compound binding	255/ 585	12602/ 32702	0.0202349	0.0128506	0.371177	Os08g0507100;Os01g0742400;Os01g0915900;Os11g0161133;Os11g0666200;Os12g0257600;Os09g0313600;Os11g0598300;Os02g0306401;Os07g0597200;Os01g0730700;Os10g0512400;Os01g0137875;Os01g0115600;Os02g0571900;Os02g0252400;Os01g0115566;Os06g0125800;Os07g0416600;Os04g0223500;Os06g0267900;Os04g0180400;Os01g0721400;Os01g0137950;Os04g0430600;Os08g0140300;Os02g0135200;Os06g0698802;Os01g0356951;Os03g0105500;Os11g0226…	CYP76M10;;;;OsRLCK345;OsLAC28;;;OsNAAT1;;OsWRKY14;CYP84A5;;OsRLCK11;CYP76M6;RPBF;OsRLCK10;OsBBI1;;;;CYP99A2;;OsRLCK23;;TDC1;OsMPK13;;;;;;OsCYP71E5;OsAGO18;;;;;;;OsABCA4;ERF77;OsABCC16;;;CYP76M5;;OsLRR;;OsCYP76M7;;OsProDH;;;;OsOPR4;OsWRKY67;OsRLCK353;;;;;OsNAC4;OsMyb4;prx22;CYP71Z2;OsRLCK110;AOS2;HSFB1;;OsKO5;Oscyp71Z8;;;;OsRLCK282;;;CYP72A1;ONAC045;;ONAC077;CYP76M8;;WRKY45;;;R2R3-MYB;;OsDREB1B;;;…
4	GO:0014070	BP	response to organic cyclic compound	4/ 585	51/ 32702	0.0784314	0.0130487	0.373726	Os09g0417600;Os01g0194300;Os09g0417800;Os02g0181300	WRKY76;NH1;WRKY62;WRKY71
2	GO:0046189	BP	phenol-containing compound biosynthetic process	2/ 585	10/ 32702	0.2	0.0130714	0.373726	Os08g0140500;Os08g0140300	OsTDC3;TDC1
28	GO:0005576	CC	extracellular region	28/ 585	966/ 32702	0.0289855	0.0130167	0.373726	Os12g0257600;Os08g0485800;Os01g0850550;Os09g0365900;Os08g0158200;Os01g0296450;Os11g0641500;Os07g0124100;Os10g0346300;Os04g0664900;Os01g0382000;Os08g0460000;Os12g0628600;Os12g0258700;Os09g0472700;Os01g0124100;Os01g0660200;Os02g0752250;Os04g0688500;Os03g0693700;Os10g0538200;Os10g0450900;Os10g0537800;Os07g0129300;Os01g0963000;Os01g0687400;Os04g0288100;Os07g0129200	OsLAC28;;OsLAC7;OsORAP1;;;OsLAC23;OsPSK4;OsLAC17;OsCIN5;OsPR1b;OsGLP1;OsPR5;OsLAC29;;RBBI3-2;C10728;;prx62;OsOxO1;;GRP;;OsPR1;prx22;;;PR1A
57	GO:0006355	BP	regulation of DNA-templated transcription	57/ 585	2297/ 32702	0.024815	0.01395	0.394846	Os11g0668650;Os12g0556200;Os01g0194300;Os11g0664800;Os01g0575200;Os05g0474800;Os11g0106100;Os11g0127600;Os04g0354200;Os10g0562900;Os12g0123800;Os01g0730700;Os01g0289600;Os05g0322900;Os12g0105600;Os03g0764100;Os12g0564100;Os01g0821600;Os02g0252400;Os09g0522000;Os01g0826400;Os03g0105500;Os08g0386200;Os01g0159800;Os11g0490900;Os03g0327800;Os06g0726300;Os07g0225300;Os07g0235200;Os07g0680400;Os01g0246…	;;NH1;;OsbHLH024;OsWRKY70;;ONAC045;;DERF12;ONAC077;OsWRKY14;OsWRKY9;WRKY45;;WZF1;R2R3-MYB;OsWRKY21;RPBF;OsDREB1B;OsWRKY24;;OsWRKY69;OsbHLH035;OsWRKY72;NAC58;NAC95;OsNAC3;;WRKY47;OsWRKY1;ZFP36;OsWRKY77;;HDAC2;OsWRKY8;OsWRKY32;;WRKY28;OsWRKY79;;WRKY71;WRKY76;SPL7;;ERF91;OsWRKY67;HSFB1;DPF;WRKY53;OsDREB1A;OsNAC4;OsMyb4;ERF77;OsERF101;WRKY62;SNAC1
57	GO:2001141	BP	regulation of RNA biosynthetic process	57/ 585	2297/ 32702	0.024815	0.01395	0.394846	Os11g0668650;Os12g0556200;Os01g0194300;Os11g0664800;Os01g0575200;Os05g0474800;Os11g0106100;Os11g0127600;Os04g0354200;Os10g0562900;Os12g0123800;Os01g0730700;Os01g0289600;Os05g0322900;Os12g0105600;Os03g0764100;Os12g0564100;Os01g0821600;Os02g0252400;Os09g0522000;Os01g0826400;Os03g0105500;Os08g0386200;Os01g0159800;Os11g0490900;Os03g0327800;Os06g0726300;Os07g0225300;Os07g0235200;Os07g0680400;Os01g0246…	;;NH1;;OsbHLH024;OsWRKY70;;ONAC045;;DERF12;ONAC077;OsWRKY14;OsWRKY9;WRKY45;;WZF1;R2R3-MYB;OsWRKY21;RPBF;OsDREB1B;OsWRKY24;;OsWRKY69;OsbHLH035;OsWRKY72;NAC58;NAC95;OsNAC3;;WRKY47;OsWRKY1;ZFP36;OsWRKY77;;HDAC2;OsWRKY8;OsWRKY32;;WRKY28;OsWRKY79;;WRKY71;WRKY76;SPL7;;ERF91;OsWRKY67;HSFB1;DPF;WRKY53;OsDREB1A;OsNAC4;OsMyb4;ERF77;OsERF101;WRKY62;SNAC1
18	GO:0005509	MF	calcium ion binding	18/ 585	551/ 32702	0.0326679	0.013928	0.394846	Os10g0111400;Os05g0312600;Os07g0631700;Os12g0406000;Os04g0371000;Os11g0691280;Os03g0743500;Os02g0632800;Os09g0471400;Os11g0694100;Os06g0683400;Os04g0611400;Os12g0138050;Os09g0482640;Os04g0370900;Os01g0955100;Os09g0412300;Os11g0691400	OsWAK95;OsCML21;;;;OsRLCK353;OsCML4;WAK14;OsWAK81;OsWAK123;OsCCD1;;;OsWAK87;;OsCML31;;
9	GO:0005516	MF	calmodulin binding	9/ 585	211/ 32702	0.042654	0.0141905	0.400315	Os11g0668650;Os12g0556200;Os01g0134700;Os12g0406000;Os12g0506600;Os12g0556500;Os12g0547600;Os02g0562600;Os11g0664800	;;;;;;CaMBP;OsMLO10;
489	GO:0003674	MF	molecular_function	489/ 585	26035/ 32702	0.0187824	0.0149346	0.415763	Os01g0915900;Os06g0210900;Os08g0404500;Os01g0267300;Os09g0313600;Os01g0137875;Os01g0115600;Os06g0683400;Os01g0115566;Os04g0581000;Os07g0416600;Os06g0267900;Os04g0468000;Os01g0296450;Os04g0664900;Os01g0159800;Os02g0582600;Os02g0649900;Os09g0412300;Os11g0226933;Os11g0229300;Os05g0550800;Os11g0667000;Os12g0616500;Os02g0569000;Os04g0556400;Os08g0448000;Os10g0537800;Os02g0765900;Os03g0407900;Os03g0180…	;;;OsSRP-QKG;;;OsRLCK11;OsCCD1;OsRLCK10;;;;;;OsCIN5;OsbHLH035;;YSL2;;;;;OsRLCK346;OsCHX15;CYP76M5;;4CL5;;;OsRLCK110;OsJAZ2;;KO4;ONAC045;;;WRKY45;;;;OsSTRL19;;;;;OsWAK95;;;Rpp17;;OsGLR1.3;;;LYP2;OsLOX8;;ACO2;OsAT19;;;OsPDR8;OsUGT710C2;OsWRKY70;OsWAK101;;NH1;;OsWRKY9;;OsTDC3;Lox2:Os:1;YR2;OsRLCK241;;;OsWRKY72;NAC95;;;;OsWAK81;;OsAT5;OsABCC9;DPF;OsCAT1;;OsPTR3;OsWRKY1;OsBDG1;;ClpD1;;;OsSub8;OsPUB40;…
39	GO:0007165	BP	signal transduction	39/ 585	1468/ 32702	0.0265668	0.0150494	0.417584	Os07g0130800;Os01g0194300;Os11g0666200;Os07g0131375;Os10g0142600;Os07g0271000;Os12g0555000;Os07g0150700;Os10g0562900;Os02g0640500;Os01g0826400;Os07g0124100;Os03g0327800;Os02g0135200;Os12g0555200;Os02g0632800;Os08g0343000;Os10g0111400;Os12g0555300;Os02g0181300;Os11g0661800;Os05g0550800;Os04g0371000;Os11g0667000;Os09g0471400;Os11g0694100;Os09g0545300;Os03g0141100;Os09g0425900;Os04g0370900;Os01g0699…	;NH1;OsRLCK345;;OsWAK101;;RSOsPR10;CIPK23;DERF12;SIT1;OsWRKY24;OsPSK4;NAC58;OsMPK13;RPR10b;WAK14;OsRLCK251;OsWAK95;PR10;WRKY71;;;;OsRLCK346;OsWAK81;OsWAK123;SAUR39;;OsSAP;;OsNPK1-PK;ERF91;;OsRLCK353;OsPR10a;OsRLCK348;OsWAK87;OsERF101;
10	GO:0060089	MF	molecular transducer activity	10/ 585	251/ 32702	0.0398406	0.0155616	0.430385	Os07g0130800;Os02g0640500;Os12g0555300;Os07g0131375;Os12g0555000;Os12g0555500;Os09g0431100;Os03g0772600;Os04g0288500;Os12g0555200	;SIT1;PR10;;RSOsPR10;OsPR10a;OsGLR1.3;;;RPR10b
2	GO:0006538	BP	glutamate catabolic process	2/ 585	11/ 32702	0.181818	0.0157885	0.433824	Os03g0236200;Os02g0650900	OsGAD3;OsGDH3
12	GO:0009266	BP	response to temperature stimulus	12/ 585	321/ 32702	0.0373832	0.0165578	0.446587	Os02g0526400;Os01g0194300;Os12g0406000;Os12g0533550;Os11g0454300;Os05g0530400;Os09g0456800;Os02g0181300;Os05g0322900;Os02g0650900;Os11g0451700;Os04g0517100	ClpD1;NH1;;;Rab16A;SPL7;HSFB1;WRKY71;WRKY45;OsGDH3;OsLEA25;OsMyb4
13	GO:1901605	BP	alpha-amino acid metabolic process	13/ 585	366/ 32702	0.0355191	0.0167439	0.446587	Os08g0320400;Os08g0140500;Os02g0626532;Os10g0419400;Os05g0427400;Os07g0182100;Os02g0306401;Os02g0608550;Os09g0255400;Os08g0140300;Os10g0550900;Os03g0236200;Os02g0650900	;OsTDC3;;SIP2;OsPAL04;OsTSA;OsNAAT1;;IGPS;TDC1;OsProDH;OsGAD3;OsGDH3
6	GO:1901606	BP	alpha-amino acid catabolic process	6/ 585	115/ 32702	0.0521739	0.0174905	0.446587	Os05g0427400;Os02g0626532;Os02g0306401;Os10g0550900;Os03g0236200;Os02g0650900	OsPAL04;;OsNAAT1;OsProDH;OsGAD3;OsGDH3
6	GO:0043086	BP	negative regulation of catalytic activity	6/ 585	115/ 32702	0.0521739	0.0174905	0.446587	Os12g0437800;Os05g0494200;Os12g0555000;Os01g0615050;Os01g0124100;Os01g0615100	Sci1;Oc2*;RSOsPR10;;RBBI3-2;OCPI2
1	GO:0080151	BP	positive regulation of salicylic acid mediated signaling pathway	1/ 585	1/ 32702	1	0.0178888	0.446587	Os05g0322900	WRKY45
1	GO:0033198	BP	response to ATP	1/ 585	1/ 32702	1	0.0178888	0.446587	Os01g0194300	NH1
1	GO:0046683	BP	response to organophosphorus	1/ 585	1/ 32702	1	0.0178888	0.446587	Os01g0194300	NH1
1	GO:0014074	BP	response to purine-containing compound	1/ 585	1/ 32702	1	0.0178888	0.446587	Os01g0194300	NH1
1	GO:1905034	BP	regulation of antifungal innate immune response	1/ 585	1/ 32702	1	0.0178888	0.446587	Os06g0649000	WRKY28
1	GO:0106167	BP	extracellular ATP signaling	1/ 585	1/ 32702	1	0.0178888	0.446587	Os01g0194300	NH1
1	GO:0071318	BP	cellular response to ATP	1/ 585	1/ 32702	1	0.0178888	0.446587	Os01g0194300	NH1
8	GO:0005615	CC	extracellular space	8/ 585	182/ 32702	0.043956	0.0171429	0.446587	Os01g0795200;Os08g0351300;Os07g0129300;Os08g0158200;Os01g0267300;Os01g0795000;Os07g0129200;Os01g0794800	OsSub8;;OsPR1;;OsSRP-QKG;RSP1;PR1A;
4	GO:0035673	MF	oligopeptide transmembrane transporter activity	4/ 585	55/ 32702	0.0727273	0.0168466	0.446587	Os04g0524600;Os04g0524500;Os10g0470700;Os02g0649900	OsYSL12;OsYSL13;OsPTR3;YSL2
4	GO:0010333	MF	terpene synthase activity	4/ 585	55/ 32702	0.0727273	0.0168466	0.446587	Os12g0491800;Os04g0178300;Os11g0474800;Os04g0179700	OsKSL10;OsCPS4;OsKS8;OsKS4
4	GO:1904680	MF	peptide transmembrane transporter activity	4/ 585	55/ 32702	0.0727273	0.0168466	0.446587	Os04g0524600;Os04g0524500;Os10g0470700;Os02g0649900	OsYSL12;OsYSL13;OsPTR3;YSL2
1	GO:0005356	MF	glucose:proton symporter activity	1/ 585	1/ 32702	1	0.0178888	0.446587	Os03g0218400	OsMST4
1	GO:0005358	MF	high-affinity glucose:proton symporter activity	1/ 585	1/ 32702	1	0.0178888	0.446587	Os03g0218400	OsMST4
1	GO:0008667	MF	2,3-dihydro-2,3-dihydroxybenzoate dehydrogenase activity	1/ 585	1/ 32702	1	0.0178888	0.446587	Os04g0179100	OsSDR110C-MS2
1	GO:0034280	MF	ent-sandaracopimaradiene synthase activity	1/ 585	1/ 32702	1	0.0178888	0.446587	Os12g0491800	OsKSL10
1	GO:0015434	MF	ABC-type cadmium transporter activity	1/ 585	1/ 32702	1	0.0178888	0.446587	Os07g0522500	ABCG43
1	GO:0033855	MF	nicotianamine aminotransferase activity	1/ 585	1/ 32702	1	0.0178888	0.446587	Os02g0306401	OsNAAT1
1	GO:0034283	MF	syn-stemod-13(17)-ene synthase activity	1/ 585	1/ 32702	1	0.0178888	0.446587	Os11g0474800	OsKS8
1	GO:0004657	MF	proline dehydrogenase activity	1/ 585	1/ 32702	1	0.0178888	0.446587	Os10g0550900	OsProDH
1	GO:0102598	MF	3alpha-hydroxy-ent-sandaracopimardiene 7-beta-monooxygenase activity	1/ 585	1/ 32702	1	0.0178888	0.446587	Os02g0569400	CYP76M8
1	GO:0051498	MF	syn-copalyl diphosphate synthase activity	1/ 585	1/ 32702	1	0.0178888	0.446587	Os04g0178300	OsCPS4
1	GO:0034279	MF	syn-pimara-7,15-diene synthase activity	1/ 585	1/ 32702	1	0.0178888	0.446587	Os04g0179700	OsKS4
1	GO:0009679	MF	hexose:proton symporter activity	1/ 585	1/ 32702	1	0.0178888	0.446587	Os03g0218400	OsMST4
6	GO:0044092	BP	negative regulation of molecular function	6/ 585	116/ 32702	0.0517241	0.0181753	0.452405	Os12g0437800;Os05g0494200;Os12g0555000;Os01g0615050;Os01g0124100;Os01g0615100	Sci1;Oc2*;RSOsPR10;;RBBI3-2;OCPI2
2	GO:0016151	MF	nickel cation binding	2/ 585	12/ 32702	0.166667	0.018724	0.464696	Os03g0288000;Os10g0419400	OsMT1b;SIP2
4	GO:0031408	BP	oxylipin biosynthetic process	4/ 585	57/ 32702	0.0701754	0.0189786	0.468267	Os06g0215900;Os08g0508800;Os03g0225900;Os08g0509100	OsOPR4;Lox2:Os:1;AOS2;OsLOX8
4	GO:0031407	BP	oxylipin metabolic process	4/ 585	57/ 32702	0.0701754	0.0189786	0.468267	Os06g0215900;Os08g0508800;Os03g0225900;Os08g0509100	OsOPR4;Lox2:Os:1;AOS2;OsLOX8
3	GO:0015749	BP	monosaccharide transmembrane transport	3/ 585	32/ 32702	0.09375	0.0192279	0.47304	Os03g0218400;Os07g0106200;Os11g0594000	OsMST4;OsMST3;
58	GO:0051252	BP	regulation of RNA metabolic process	58/ 585	2392/ 32702	0.0242475	0.0197472	0.484408	Os11g0668650;Os12g0556200;Os01g0194300;Os11g0664800;Os01g0575200;Os05g0474800;Os11g0106100;Os11g0127600;Os04g0354200;Os10g0562900;Os12g0123800;Os01g0730700;Os01g0289600;Os05g0322900;Os12g0105600;Os03g0764100;Os12g0564100;Os01g0821600;Os02g0252400;Os09g0522000;Os01g0826400;Os03g0105500;Os02g0789700;Os08g0386200;Os01g0159800;Os11g0490900;Os03g0327800;Os06g0726300;Os07g0225300;Os07g0235200;Os07g0680…	;;NH1;;OsbHLH024;OsWRKY70;;ONAC045;;DERF12;ONAC077;OsWRKY14;OsWRKY9;WRKY45;;WZF1;R2R3-MYB;OsWRKY21;RPBF;OsDREB1B;OsWRKY24;;;OsWRKY69;OsbHLH035;OsWRKY72;NAC58;NAC95;OsNAC3;;WRKY47;OsWRKY1;ZFP36;OsWRKY77;;HDAC2;OsWRKY8;OsWRKY32;;WRKY28;OsWRKY79;;WRKY71;WRKY76;SPL7;;ERF91;OsWRKY67;HSFB1;DPF;WRKY53;OsDREB1A;OsNAC4;OsMyb4;ERF77;OsERF101;WRKY62;SNAC1
5	GO:0004675	MF	transmembrane receptor protein serine/threonine kinase activity	5/ 585	87/ 32702	0.0574713	0.0200621	0.489296	Os07g0131375;Os04g0288500;Os02g0640500;Os07g0130800;Os03g0772600	;;SIT1;;
9	GO:0000287	MF	magnesium ion binding	9/ 585	225/ 32702	0.04	0.0206288	0.498805	Os03g0326000;Os01g0160100;Os11g0474800;Os03g0326100;Os04g0178300;Os03g0326200;Os04g0179700;Os12g0491800;Os05g0100600	;;OsKS8;;OsCPS4;;OsKS4;OsKSL10;
59	GO:0019219	BP	regulation of nucleobase-containing compound metabolic process	59/ 585	2462/ 32702	0.0239643	0.0216301	0.514842	Os11g0668650;Os12g0556200;Os01g0194300;Os11g0664800;Os01g0575200;Os05g0474800;Os11g0106100;Os11g0127600;Os04g0354200;Os10g0562900;Os12g0123800;Os01g0730700;Os01g0289600;Os05g0322900;Os12g0105600;Os03g0764100;Os12g0564100;Os01g0821600;Os02g0252400;Os09g0522000;Os01g0826400;Os03g0105500;Os02g0789700;Os08g0386200;Os01g0159800;Os11g0490900;Os03g0327800;Os06g0726300;Os07g0225300;Os07g0235200;Os07g0680…	;;NH1;;OsbHLH024;OsWRKY70;;ONAC045;;DERF12;ONAC077;OsWRKY14;OsWRKY9;WRKY45;;WZF1;R2R3-MYB;OsWRKY21;RPBF;OsDREB1B;OsWRKY24;;;OsWRKY69;OsbHLH035;OsWRKY72;NAC58;NAC95;OsNAC3;;WRKY47;OsWRKY1;ZFP36;OsWRKY77;;HDAC2;OsWRKY8;OsWRKY32;;WRKY28;OsWRKY79;;WRKY71;WRKY76;SPL7;;ERF91;OsWRKY67;HSFB1;DPF;WRKY53;OsDREB1A;OsNAC4;OsMyb4;ERF77;OsERF101;;WRKY62;SNAC1
2	GO:1900424	BP	regulation of defense response to bacterium	2/ 585	13/ 32702	0.153846	0.0218693	0.514842	Os05g0322900;Os09g0417800	WRKY45;WRKY62
2	GO:0032102	BP	negative regulation of response to external stimulus	2/ 585	13/ 32702	0.153846	0.0218693	0.514842	Os05g0322900;Os09g0417800	WRKY45;WRKY62
2	GO:0002832	BP	negative regulation of response to biotic stimulus	2/ 585	13/ 32702	0.153846	0.0218693	0.514842	Os05g0322900;Os09g0417800	WRKY45;WRKY62
5	GO:0002229	BP	defense response to oomycetes	5/ 585	89/ 32702	0.0561798	0.0219004	0.514842	Os07g0131375;Os04g0288500;Os02g0640500;Os07g0130800;Os03g0772600	;;SIT1;;
5	GO:0002239	BP	response to oomycetes	5/ 585	89/ 32702	0.0561798	0.0219004	0.514842	Os07g0131375;Os04g0288500;Os02g0640500;Os07g0130800;Os03g0772600	;;SIT1;;
4	GO:0016838	MF	carbon-oxygen lyase activity, acting on phosphates	4/ 585	60/ 32702	0.0666667	0.0224768	0.525472	Os12g0491800;Os04g0178300;Os11g0474800;Os04g0179700	OsKSL10;OsCPS4;OsKS8;OsKS4
26	GO:0044255	BP	cellular lipid metabolic process	26/ 585	925/ 32702	0.0281081	0.0228891	0.533639	Os06g0568600;Os04g0179700;Os10g0390900;Os02g0569400;Os12g0491800;Os01g0561600;Os02g0571900;Os08g0508800;Os02g0205500;Os04g0178300;Os06g0599200;Os02g0181300;Os08g0509100;Os06g0569500;Os12g0435200;Os04g0180400;Os02g0569000;Os04g0178400;Os07g0190000;Os06g0215900;Os01g0693300;Os02g0569900;Os09g0394600;Os07g0217600;Os01g0150900;Os03g0225900	OsKO5;OsKS4;;CYP76M8;OsKSL10;CYP76M14;CYP76M6;Lox2:Os:1;;OsCPS4;;WRKY71;OsLOX8;KO4;OsNCED2;CYP99A2;CYP76M5;;OsDXS;OsOPR4;;OsCYP76M7;;CYP71Z2;;AOS2
6	GO:0009063	BP	amino acid catabolic process	6/ 585	124/ 32702	0.0483871	0.0243228	0.561503	Os05g0427400;Os01g0160100;Os02g0626532;Os10g0550900;Os03g0236200;Os02g0650900	OsPAL04;;;OsProDH;OsGAD3;OsGDH3
22	GO:0008610	BP	lipid biosynthetic process	22/ 585	754/ 32702	0.0291777	0.0250073	0.570449	Os06g0568600;Os04g0179700;Os10g0390900;Os02g0569400;Os12g0491800;Os01g0561600;Os02g0571900;Os08g0508800;Os02g0205500;Os04g0178300;Os06g0599200;Os08g0509100;Os06g0569500;Os12g0435200;Os02g0569000;Os07g0482900;Os07g0190000;Os06g0215900;Os02g0569900;Os07g0217600;Os01g0150900;Os03g0225900	OsKO5;OsKS4;;CYP76M8;OsKSL10;CYP76M14;CYP76M6;Lox2:Os:1;;OsCPS4;;OsLOX8;KO4;OsNCED2;CYP76M5;;OsDXS;OsOPR4;OsCYP76M7;CYP71Z2;;AOS2
2	GO:0043649	BP	dicarboxylic acid catabolic process	2/ 585	14/ 32702	0.142857	0.0252159	0.572125	Os03g0236200;Os02g0650900	OsGAD3;OsGDH3
2	GO:0045548	MF	phenylalanine ammonia-lyase activity	2/ 585	14/ 32702	0.142857	0.0252159	0.572125	Os05g0427400;Os02g0626532	OsPAL04;
348	GO:0005488	MF	binding	348/ 585	17962/ 32702	0.0193742	0.0262472	0.590771	Os01g0915900;Os08g0404500;Os09g0313600;Os01g0137875;Os01g0115600;Os06g0683400;Os01g0115566;Os04g0581000;Os07g0416600;Os06g0267900;Os04g0468000;Os01g0159800;Os02g0582600;Os09g0412300;Os11g0226933;Os11g0229300;Os05g0550800;Os11g0667000;Os02g0569000;Os04g0399300;Os02g0765900;Os03g0407900;Os03g0180900;Os06g0569500;Os11g0127600;Os01g0670300;Os04g0611400;Os05g0322900;Os01g0816600;Os05g0253200;Os08g0514…	;;;;OsRLCK11;OsCCD1;OsRLCK10;;;;;OsbHLH035;;;;;;OsRLCK346;CYP76M5;;;OsRLCK110;OsJAZ2;KO4;ONAC045;;;WRKY45;;;;;OsWAK95;;Rpp17;;OsBBI1;;OsOxO1;LYP2;OsLOX8;;ACO2;;OsPDR8;OsWRKY70;OsWAK101;;NH1;;OsWRKY9;OsTDC3;Lox2:Os:1;YR2;;;;OsWRKY72;NAC95;;;OsWAK81;;OsABCC9;DPF;;;OsWRKY1;;ClpD1;;;;OsRLCK337;OsKS4;OsCML21;CaMBP;NAC58;OsEXO70FX1;MT1A;OsKS8;OsWRKY8;;;OsWRKY79;OsMLO10;;OsKMD2;OsNPK1-PK;SPL7;;;OsMMP1;;…
41	GO:0055085	BP	transmembrane transport	41/ 585	1619/ 32702	0.0253243	0.0263873	0.590782	Os08g0127100;Os11g0594000;Os03g0150600;Os01g0930400;Os11g0587600;Os07g0150700;Os07g0232800;Os02g0699000;Os01g0609300;Os10g0444700;Os04g0401700;Os04g0435100;Os11g0155600;Os03g0187800;Os08g0384500;Os02g0649900;Os07g0522500;Os01g0337500;Os08g0398300;Os04g0524500;Os06g0560000;Os12g0616500;Os09g0472100;Os04g0597600;Os09g0431100;Os10g0360100;Os03g0218400;Os03g0838400;Os01g0831300;Os07g0106200;Os04g0209…	OsHT;;PT1;HAK5;OsABCG48;CIPK23;OsZIP8;OsNPF7.2;OsPDR9;PT8;HAK1;OsBAT7;OsABCC16;OsPUP1;OsABCG44;YSL2;ABCG43;;OsABCA4;OsYSL13;;OsCHX15;OsABCG22;OsPTR5;OsGLR1.3;;OsMST4;AMT3;OsAMT2;OsMST3;OsABCC10;;OsABCC9;;OsCAT1;OsYSL12;OsPT19;MDR4;OsPTR3;;OsPDR8
13	GO:0015399	MF	primary active transmembrane transporter activity	13/ 585	372/ 32702	0.0349462	0.0265767	0.593453	Os01g0609300;Os04g0209300;Os07g0522500;Os01g0337500;Os04g0209200;Os01g0342750;Os08g0398300;Os11g0587600;Os11g0155600;Os01g0695800;Os08g0384500;Os01g0609900;Os09g0472100	OsPDR9;OsABCC10;ABCG43;;OsABCC9;;OsABCA4;OsABCG48;OsABCC16;MDR4;OsABCG44;OsPDR8;OsABCG22
4	GO:0120255	BP	olefinic compound biosynthetic process	4/ 585	64/ 32702	0.0625	0.0277146	0.611285	Os12g0435200;Os05g0427400;Os09g0451400;Os02g0626532	OsNCED2;OsPAL04;ACO2;
18	GO:0016053	BP	organic acid biosynthetic process	18/ 585	594/ 32702	0.030303	0.0278809	0.611285	Os08g0320400;Os05g0427400;Os06g0568600;Os08g0508800;Os02g0626532;Os10g0419400;Os12g0435200;Os02g0205500;Os08g0509100;Os04g0178300;Os06g0215900;Os02g0608550;Os09g0255400;Os01g0150900;Os06g0569500;Os07g0182100;Os03g0225900;Os10g0104000	;OsPAL04;OsKO5;Lox2:Os:1;;SIP2;OsNCED2;;OsLOX8;OsCPS4;OsOPR4;;IGPS;;KO4;OsTSA;AOS2;
18	GO:0046394	BP	carboxylic acid biosynthetic process	18/ 585	594/ 32702	0.030303	0.0278809	0.611285	Os08g0320400;Os05g0427400;Os06g0568600;Os08g0508800;Os02g0626532;Os10g0419400;Os12g0435200;Os02g0205500;Os08g0509100;Os04g0178300;Os06g0215900;Os02g0608550;Os09g0255400;Os01g0150900;Os06g0569500;Os07g0182100;Os03g0225900;Os10g0104000	;OsPAL04;OsKO5;Lox2:Os:1;;SIP2;OsNCED2;;OsLOX8;OsCPS4;OsOPR4;;IGPS;;KO4;OsTSA;AOS2;
4	GO:0019888	MF	protein phosphatase regulator activity	4/ 585	64/ 32702	0.0625	0.0277146	0.611285	Os12g0555500;Os12g0555300;Os12g0555200;Os12g0555000	OsPR10a;PR10;RPR10b;RSOsPR10
2	GO:0048640	BP	negative regulation of developmental growth	2/ 585	15/ 32702	0.133333	0.0287557	0.628836	Os06g0125800;Os09g0545300	OsBBI1;SAUR39
73	GO:0060255	BP	regulation of macromolecule metabolic process	73/ 585	3187/ 32702	0.0229056	0.0289359	0.631145	Os11g0668650;Os12g0556200;Os01g0194300;Os12g0437800;Os11g0664800;Os01g0575200;Os05g0474800;Os12g0533550;Os11g0127600;Os04g0354200;Os10g0562900;Os12g0123800;Os01g0730700;Os01g0289600;Os05g0322900;Os08g0386200;Os12g0105600;Os01g0615100;Os12g0564100;Os01g0821600;Os02g0252400;Os09g0522000;Os01g0160800;Os01g0826400;Os12g0555300;Os03g0105500;Os02g0789700;Os05g0494200;Os01g0615050;Os01g0159800;Os11g0490…	;;NH1;Sci1;;OsbHLH024;OsWRKY70;;ONAC045;;DERF12;ONAC077;OsWRKY14;OsWRKY9;WRKY45;OsWRKY69;;OCPI2;R2R3-MYB;OsWRKY21;RPBF;OsDREB1B;;OsWRKY24;PR10;;;Oc2*;;OsbHLH035;OsWRKY72;NAC58;NAC95;OsNAC3;;RPR10b;WRKY47;OsWRKY1;ZFP36;WRKY76;OsAGO18;OsWRKY77;;HDAC2;OsWRKY8;OsWRKY32;WZF1;;WRKY28;OsWRKY79;RBBI3-2;RSOsPR10;;WRKY71;;SPL7;;ERF91;;OsWRKY67;OsCAF1B;DPF;WRKY53;OsPR10a;OsDREB1A;OsNAC4;OsMyb4;ERF77;HSFB1;O…
4	GO:1901136	BP	carbohydrate derivative catabolic process	4/ 585	65/ 32702	0.0615385	0.0291281	0.632049	Os10g0542900;Os04g0493600;Os03g0132900;Os06g0726200	Cht8;;Cht11;Cht1*(Chi1)
4	GO:0019208	MF	phosphatase regulator activity	4/ 585	65/ 32702	0.0615385	0.0291281	0.632049	Os12g0555500;Os12g0555300;Os12g0555200;Os12g0555000	OsPR10a;PR10;RPR10b;RSOsPR10
10	GO:0010035	BP	response to inorganic substance	10/ 585	266/ 32702	0.037594	0.0303301	0.65148	Os03g0437200;Os07g0522500;Os04g0615200;Os11g0127600;Os07g0150700;Os02g0181300;Os03g0218400;Os11g0454300;Os11g0451700;Os02g0649900	ZFP36;ABCG43;;ONAC045;CIPK23;WRKY71;OsMST4;Rab16A;OsLEA25;YSL2
10	GO:0009698	BP	phenylpropanoid metabolic process	10/ 585	270/ 32702	0.037037	0.0318628	0.679231	Os05g0427400;Os10g0512400;Os11g0641500;Os12g0257600;Os04g0674700;Os12g0258700;Os10g0346300;Os01g0850550;Os08g0448000;Os02g0626532	OsPAL04;CYP84A5;OsLAC23;OsLAC28;;OsLAC29;OsLAC17;OsLAC7;4CL5;
2	GO:0071396	BP	cellular response to lipid	2/ 585	16/ 32702	0.125	0.0324807	0.680406	Os04g0180400;Os04g0178400	CYP99A2;
2	GO:0009937	BP	regulation of gibberellic acid mediated signaling pathway	2/ 585	16/ 32702	0.125	0.0324807	0.680406	Os02g0181300;Os01g0826400	WRKY71;OsWRKY24
2	GO:0000793	CC	condensed chromosome	2/ 585	16/ 32702	0.125	0.0324807	0.680406	Os04g0142400;Os04g0149400	;
2	GO:0016165	MF	linoleate 13S-lipoxygenase activity	2/ 585	16/ 32702	0.125	0.0324807	0.680406	Os08g0508800;Os08g0509100	Lox2:Os:1;OsLOX8
2	GO:0016841	MF	ammonia-lyase activity	2/ 585	16/ 32702	0.125	0.0324807	0.680406	Os05g0427400;Os02g0626532	OsPAL04;
2	GO:0004791	MF	thioredoxin-disulfide reductase (NADP) activity	2/ 585	16/ 32702	0.125	0.0324807	0.680406	Os03g0405500;Os03g0405400	;
4	GO:0120252	BP	hydrocarbon metabolic process	4/ 585	69/ 32702	0.057971	0.0352037	0.72309	Os12g0435200;Os06g0568600;Os09g0451400;Os06g0569500	OsNCED2;OsKO5;ACO2;KO4
1	GO:0010446	BP	response to alkaline pH	1/ 585	2/ 32702	0.5	0.0354582	0.72309	Os02g0650900	OsGDH3
1	GO:0010133	BP	proline catabolic process to glutamate	1/ 585	2/ 32702	0.5	0.0354582	0.72309	Os10g0550900	OsProDH
1	GO:0006562	BP	proline catabolic process	1/ 585	2/ 32702	0.5	0.0354582	0.72309	Os10g0550900	OsProDH
1	GO:1990573	BP	potassium ion import across plasma membrane	1/ 585	2/ 32702	0.5	0.0354582	0.72309	Os07g0150700	CIPK23
1	GO:0080027	BP	response to herbivore	1/ 585	2/ 32702	0.5	0.0354582	0.72309	Os01g0194300	NH1
1	GO:0048531	MF	beta-1,3-galactosyltransferase activity	1/ 585	2/ 32702	0.5	0.0354582	0.72309	Os09g0452900
1	GO:0046870	MF	cadmium ion binding	1/ 585	2/ 32702	0.5	0.0354582	0.72309	Os03g0288000	OsMT1b
1	GO:0008883	MF	glutamyl-tRNA reductase activity	1/ 585	2/ 32702	0.5	0.0354582	0.72309	Os10g0502450
2	GO:0045926	BP	negative regulation of growth	2/ 585	17/ 32702	0.117647	0.0363831	0.729094	Os06g0125800;Os09g0545300	OsBBI1;SAUR39
2	GO:0046620	BP	regulation of organ growth	2/ 585	17/ 32702	0.117647	0.0363831	0.729094	Os06g0125800;Os09g0545300	OsBBI1;SAUR39
2	GO:0032870	BP	cellular response to hormone stimulus	2/ 585	17/ 32702	0.117647	0.0363831	0.729094	Os04g0180400;Os04g0178400	CYP99A2;
7	GO:0033993	BP	response to lipid	7/ 585	173/ 32702	0.0404624	0.0366544	0.729094	Os01g0826400;Os03g0218400;Os11g0454300;Os04g0180400;Os02g0181300;Os04g0178400;Os11g0451700	OsWRKY24;OsMST4;Rab16A;CYP99A2;WRKY71;;OsLEA25
3	GO:1901000	BP	regulation of response to salt stress	3/ 585	41/ 32702	0.0731707	0.0367527	0.729094	Os02g0526400;Os02g0640500;Os03g0815100	ClpD1;SIT1;SNAC1
4	GO:0120254	BP	olefinic compound metabolic process	4/ 585	70/ 32702	0.0571429	0.0368286	0.729094	Os12g0435200;Os05g0427400;Os09g0451400;Os02g0626532	OsNCED2;OsPAL04;ACO2;
6	GO:0016831	MF	carboxy-lyase activity	6/ 585	136/ 32702	0.0441176	0.0359209	0.729094	Os08g0320400;Os08g0140500;Os01g0160100;Os09g0255400;Os08g0140300;Os03g0236200	;OsTDC3;;IGPS;TDC1;OsGAD3
3	GO:0005315	MF	inorganic phosphate transmembrane transporter activity	3/ 585	41/ 32702	0.0731707	0.0367527	0.729094	Os09g0454600;Os10g0444700;Os03g0150600	OsPT19;PT8;PT1
3	GO:0047484	BP	regulation of response to osmotic stress	3/ 585	42/ 32702	0.0714286	0.0390702	0.760117	Os02g0526400;Os02g0640500;Os03g0815100	ClpD1;SIT1;SNAC1
6	GO:0009308	BP	amine metabolic process	6/ 585	139/ 32702	0.0431655	0.0392912	0.762664	Os08g0320400;Os08g0140500;Os07g0182100;Os09g0255400;Os08g0140300;Os09g0547500	;OsTDC3;OsTSA;IGPS;TDC1;LOGL9
9	GO:0051213	MF	dioxygenase activity	9/ 585	233/ 32702	0.0386266	0.0398203	0.771166	Os04g0581000;Os08g0508800;Os10g0419400;Os12g0435200;Os10g0536400;Os09g0451400;Os03g0289800;Os10g0558750;Os08g0509100	;Lox2:Os:1;SIP2;OsNCED2;OsF3H-2;ACO2;;;OsLOX8
14	GO:1901700	BP	response to oxygen-containing compound	14/ 585	431/ 32702	0.0324826	0.0404279	0.774604	Os09g0417600;Os03g0437200;Os01g0194300;Os01g0826400;Os03g0218400;Os11g0127600;Os04g0180400;Os07g0150700;Os02g0181300;Os04g0178400;Os06g0649000;Os11g0454300;Os11g0451700;Os09g0417800	WRKY76;ZFP36;NH1;OsWRKY24;OsMST4;ONAC045;CYP99A2;CIPK23;WRKY71;;WRKY28;Rab16A;OsLEA25;WRKY62
2	GO:2000031	BP	regulation of salicylic acid mediated signaling pathway	2/ 585	18/ 32702	0.111111	0.0404555	0.774604	Os05g0322900;Os01g0194300	WRKY45;NH1
2	GO:0072488	BP	ammonium transmembrane transport	2/ 585	18/ 32702	0.111111	0.0404555	0.774604	Os03g0838400;Os01g0831300	AMT3;OsAMT2
2	GO:0016744	MF	transketolase or transaldolase activity	2/ 585	18/ 32702	0.111111	0.0404555	0.774604	Os07g0190000;Os02g0608550	OsDXS;
5	GO:0002831	BP	regulation of response to biotic stimulus	5/ 585	105/ 32702	0.047619	0.0405604	0.774859	Os06g0649000;Os05g0322900;Os01g0194300;Os09g0417800;Os03g0334250	WRKY28;WRKY45;NH1;WRKY62;
120	GO:0046872	MF	metal ion binding	120/ 585	5654/ 32702	0.0212239	0.0411062	0.783518	Os08g0507100;Os10g0512400;Os12g0257600;Os12g0491800;Os06g0683400;Os02g0571900;Os02g0252400;Os03g0743500;Os04g0581000;Os07g0416600;Os04g0600300;Os02g0582600;Os09g0271100;Os09g0412300;Os03g0437200;Os03g0326000;Os12g0512800;Os02g0649800;Os12g0435200;Os12g0258700;Os02g0569000;Os01g0667900;Os04g0498900;Os12g0406000;Os11g0691280;Os10g0139700;Os08g0509100;Os01g0963000;Os07g0217600;Os03g0225900;Os06g0568…	CYP76M10;CYP84A5;OsLAC28;OsKSL10;OsCCD1;CYP76M6;RPBF;OsCML4;;;AOX1B;;;;ZFP36;;OsCYP71E5;;OsNCED2;OsLAC29;CYP76M5;GRX6;;;OsRLCK353;;OsLOX8;prx22;CYP71Z2;AOS2;OsKO5;Oscyp71Z8;;;KO4;CYP72A1;;;CYP76M8;CYP76M14;OsMT1a;OsS3H;;OsCYP72A32;;;;;WAK14;;OsWAK95;;;;Rpp17;;OsLAC23;OsOxO1;;OsPPi-PFK;OsPP2C32;OsCYP76M7;ACO2;;OsMT1g;CYP76M2;OsCYP72A19;OsLAC7;;Lox2:Os:1;;;;;;OsCPS4;;CYP99A2;OsWAK81;OsWAK123;;;;;;p…
3	GO:1900150	BP	regulation of defense response to fungus	3/ 585	43/ 32702	0.0697674	0.0414601	0.788488	Os06g0649000;Os05g0322900;Os03g0334250	WRKY28;WRKY45;
9	GO:0050790	BP	regulation of catalytic activity	9/ 585	241/ 32702	0.0373444	0.042997	0.815883	Os12g0555300;Os05g0494200;Os12g0555000;Os01g0615050;Os12g0555500;Os12g0437800;Os01g0124100;Os01g0615100;Os12g0555200	PR10;Oc2*;RSOsPR10;;OsPR10a;Sci1;RBBI3-2;OCPI2;RPR10b
10	GO:0019439	BP	aromatic compound catabolic process	10/ 585	294/ 32702	0.0340136	0.0448627	0.84938	Os05g0427400;Os01g0160100;Os02g0626532;Os12g0257600;Os12g0258700;Os04g0684900;Os10g0346300;Os01g0850550;Os02g0306401;Os11g0641500	OsPAL04;;;OsLAC28;OsLAC29;OsCAF1B;OsLAC17;OsLAC7;OsNAAT1;OsLAC23
120	GO:0043169	MF	cation binding	120/ 585	5688/ 32702	0.021097	0.0474984	0.897275	Os08g0507100;Os10g0512400;Os12g0257600;Os12g0491800;Os06g0683400;Os02g0571900;Os02g0252400;Os03g0743500;Os04g0581000;Os07g0416600;Os04g0600300;Os02g0582600;Os09g0271100;Os09g0412300;Os03g0437200;Os03g0326000;Os12g0512800;Os02g0649800;Os12g0435200;Os12g0258700;Os02g0569000;Os01g0667900;Os04g0498900;Os12g0406000;Os11g0691280;Os10g0139700;Os08g0509100;Os01g0963000;Os07g0217600;Os03g0225900;Os06g0568…	CYP76M10;CYP84A5;OsLAC28;OsKSL10;OsCCD1;CYP76M6;RPBF;OsCML4;;;AOX1B;;;;ZFP36;;OsCYP71E5;;OsNCED2;OsLAC29;CYP76M5;GRX6;;;OsRLCK353;;OsLOX8;prx22;CYP71Z2;AOS2;OsKO5;Oscyp71Z8;;;KO4;CYP72A1;;;CYP76M8;CYP76M14;OsMT1a;OsS3H;;OsCYP72A32;;;;;WAK14;;OsWAK95;;;;Rpp17;;OsLAC23;OsOxO1;;OsPPi-PFK;OsPP2C32;OsCYP76M7;ACO2;;OsMT1g;CYP76M2;OsCYP72A19;OsLAC7;;Lox2:Os:1;;;;;;OsCPS4;;CYP99A2;OsWAK81;OsWAK123;;;;;;p…
9	GO:0065009	BP	regulation of molecular function	9/ 585	252/ 32702	0.0357143	0.0489437	0.918968	Os12g0555300;Os05g0494200;Os12g0555000;Os01g0615050;Os12g0555500;Os12g0437800;Os01g0124100;Os01g0615100;Os12g0555200	PR10;Oc2*;RSOsPR10;;OsPR10a;Sci1;RBBI3-2;OCPI2;RPR10b
3	GO:1901701	BP	cellular response to oxygen-containing compound	3/ 585	46/ 32702	0.0652174	0.0490589	0.918968	Os04g0180400;Os01g0194300;Os04g0178400	CYP99A2;NH1;
2	GO:0034755	BP	iron ion transmembrane transport	2/ 585	20/ 32702	0.1	0.0490811	0.918968	Os06g0560000;Os02g0649900	;YSL2
5	GO:0042886	BP	amide transport	5/ 585	111/ 32702	0.045045	0.0494506	0.923842	Os04g0524600;Os04g0524500;Os10g0470700;Os02g0649900;Os01g0209800	OsYSL12;OsYSL13;OsPTR3;YSL2;OsCAT1
