# Supplementary material for: Selenite Serves as a Versatile Proxy for Phosphate Homeostasis Studies
Source: Research Square preprint supplement (doi:10.21203/rs.3.rs-6806744/v1), 2025-06-12
Supplement: Supplementary file 2 [file f6d62276eee47cc53ac28367.xlsx]

## Sheet: Sheet1
Usage	Primer Name	Primer (5'→ 3’)
For mutant identification	AtSPSA1-LP	TTCTAATAATGTTGCGCCTGG
	AtSPSA1-RP	CACCGGGTATGTGTTTTTACG
	AtSPSA2-LP	ATCCTATCGGGGAAGCATATG
	AtSPSA2-RP	CCTCAGATCTTCTTGCAGTGG
	AtSPSB-LP	AGGACGAGGAAGCTGTAAAGC
	AtSPSB-RP	ACCCATTTATCCACTCGTTCC
	AtSPSC-LP	GTAGTTACGGCAGTGCTCTGG
	AtSPSC-RP	GTGAATGTCAGCCTCTTCGAG
	AtPHF1-LP	ACGCCATCACGTCTCTTATTG
	AtPHF1-RP	TCAGGTGATACGCCTATGGTC
	AtPHT1;1-LP	TTCAAAATTTTGGCCATTGAG
	AtPHT1;1-RP	GAATTCCTTGGAGAACAAGCC
	AtLBb1.3-BP	ATTTTGCCGATTTCGGAAC
	hpa6-enzyme-digest-test-F	CGAGTGGATCAACGGGTAC
	hpa6-enzyme-digest-test-F	GCCGGTGAGTTCTTCTTTC
For qRT-PCR assay	AtACTIN-RT-F	TGTGCCAATCTACGAGGGTTT
	AtACTIN-RT-R	TTTCCCGCTCTGCTGTTGT
	AtSPSA1-RT-F	CCCGAATGATTTCGACGCTT
	AtSPSA1-RT-R	AGTCTTCCTCAGCCCTTCAC
	AtSPSA2-RT-F	GTGACACGGATTACGAAGGC
	AtSPSA2-RT-R	GGGACTGTTCAGTGGAGTCA
	AtSPSB-RT-F	ACGGGTCTCTTGAACCGAAT
	AtSPSB-RT-R	GTCGCCTCAAAACCGGATAC
	OsACTIN-qRT-F	CAACACCCCTGCTATGTACG
	OsACTIN-qRT-R	CATCACCAGAGTCCAACACAA
	OsHPA6-qRT-F	CTGCTCATCAACCCCAACA
	OsHPA6-qRT-R	GTGAAGAACCGGAGCACCT
For constructs	OsHAP6-Crispr-F	ggcACCGCGACCTCCACAAGACG
	OsHAP6-Crispr-R	aaacCGTCTTGTGGAGGTCGCGG
	OsHPA6-GST-inf-F(BamHI)	GGTTCCGCGTGGATCCATGGCGGTGGGGAACGAG
	OsHPA6-GST-inf-R(SmaI)	CGCTCGAGTCGACCCGGGTCAGATGGCCTTGAGGAG
	OsHPA6-GFP-inf-F(BamHI)	CGGGATCCATGGCGGTGGGGAACGAGTG
	OsHPA6-GFP-inf-R(XhoI)	CCGCTCGAGGATGGCCTTGAGGAGGT
